## Splicing buffers suboptimal codon usage in human cells

Christine Mordstein<sup>1,2</sup>, Rosina Savisaar<sup>2,3</sup>, Robert S Young<sup>2</sup>, Jeanne Bazile<sup>1</sup>, Lana Talmane<sup>1</sup>, Juliet Luft<sup>1</sup>, Michael Liss<sup>4</sup>, Martin S Taylor<sup>1</sup>, Laurence D Hurst<sup>2</sup>, Grzegorz Kudla<sup>1\*</sup>

<sup>1</sup>MRC Human Genetics Unit, Institute for Genetics and Molecular Medicine, The University of Edinburgh, Scotland, UK

<sup>2</sup>Milner Centre for Evolution, Department of Biology and Biochemistry, University of Bath, Bath, UK

<sup>3</sup>School of Communication and Information Technology, Nile University, Giza, Egypt

<sup>4</sup>Thermo Fisher Scientific, GENEART GmbH, Regensburg, Germany

4,024 words (main text)

6 Figures

6 Supplementary Figures

2 Supplementary Tables

\*Corresponding author: Grzegorz Kudla ([gkudla@gmail.com](mailto:gkudla@gmail.com))

1 **Abstract**

2

3 Although multiple studies have addressed the effects of codon usage on gene  
4 expression, such studies were typically performed in unspliced model genes. In  
5 the human genome, most genes undergo splicing and patterns of codon usage are  
6 splicing-dependent: guanine and cytosine (GC) content is highest within single-  
7 exon genes and within first exons of multi-exon genes. Intrigued by this  
8 observation, we measured the effects of splicing on expression in a panel of  
9 synonymous variants of GFP and mKate2 reporter genes that varied in  
10 nucleotide composition. We found that splicing promotes the expression of  
11 adenine and thymine (AT)-rich variants by increasing their steady-state protein  
12 and mRNA levels, in part through promoting cytoplasmic localization of mRNA.  
13 Splicing had little or no effect on the expression of GC-rich variants. In the  
14 absence of splicing, high GC content at the 5' end, but not at the 3' end of the  
15 coding sequence positively correlated with expression. Among endogenous  
16 human protein-coding transcripts, GC content has a more positive effect on  
17 various expression measures of unspliced, relative to spliced mRNAs. We  
18 propose that splicing promotes the expression of AT-rich genes, leading to  
19 selective pressure for the retention of introns in the human genome.

20

## 21 **Introduction**

22

23 Mammalian genomes are characterised by large regional variation in base  
24 composition (Bernardi, 1993). Regions with a high density of G and C nucleotides  
25 (GC-rich regions) are in an open, transcriptionally active state, are gene-dense,  
26 and replicate early. In contrast, AT-rich regions are enriched with  
27 heterochromatin, contain large gene deserts and replicate late (Arhondakis et al.,  
28 2011; Lander et al., 2001; Vinogradov, 2003). The mechanisms that give rise to  
29 this compositional heterogeneity have been under debate for years and many  
30 researchers believe that the pattern originates from the process of GC-biased  
31 gene conversion (Duret and Galtier, 2009), though other neutral and selective  
32 mechanisms have been proposed as well (Eyre-Walker, 1991; Galtier et al., 2018;  
33 Plotkin and Kudla, 2011; Sharp and Li, 1987b).

34

35 The sequence composition of mammalian genes correlates with the GC-content  
36 of their genomic location. Thus, introns and exons of genes located in GC-rich  
37 parts of the genome are themselves GC-rich. This can potentially influence gene  
38 expression in multiple ways: nucleotide composition affects the physical  
39 properties of DNA, the thermodynamic stability of RNA folding, the propensity of  
40 RNA to interact with other RNAs and proteins, the codon adaptation of mRNA to  
41 tRNA pools, and the propensity for RNA modifications, such as m6A (Dominissini  
42 et al., 2012) and ac4C (Arango et al., 2018). Strikingly, studies of the effects of  
43 nucleotide composition on gene expression in human cells have led to opposing  
44 conclusions. On the one hand, heterologous expression experiments typically  
45 report large positive effects of GC content on protein production in a wide  
46 variety of transgenes, including fluorescent reporter genes, human cDNAs, and  
47 viral genes (Bauer et al., 2010; Kosovac et al., 2011; Kotsopoulou et al., 2000;  
48 Kudla et al., 2006; Zolotukhin et al., 1996). As a result, increasing the GC content  
49 of transgenes has become a common strategy in coding sequence optimization  
50 for heterologous expression in human cells (Fath et al., 2011). On the other hand,  
51 genome-wide analyses of endogenous genes typically show little or no  
52 correlation of GC content with expression (Duan et al., 2013; Lercher et al., 2003;  
53 Rudolph et al., 2016; Semon et al., 2005).

54

55 We hypothesized that the conflicting results in heterologous and endogenous  
56 gene expression studies can be partially explained by RNA splicing. Most  
57 transgenes used in heterologous expression systems have no introns, whereas  
58 97% of genes in the human genome contain one or more introns. Splicing is  
59 known to influence gene expression at multiple stages, including nuclear RNP  
60 assembly, RNA export, and translation. If splicing selectively increased the  
61 expression of AT-rich genes, it could account for the lack of correlation of GC  
62 content and gene expression in previous genome-wide studies. We therefore  
63 compared spliced and unspliced genes with respect to their (1) genomic codon  
64 usage, (2) expression levels of reporter genes in transient and stable transfection  
65 experiments and (3) global expression patterns in human transcriptome studies.  
66 We show that splicing increases the expression of AT-rich genes, but not GC-rich  
67 genes, in part through effects on cytoplasmic RNA enrichment.

68

## 69 **Results**

70

### 71 **Codon usage of human protein-coding genes depends on RNA splicing**

72 We first analysed the relationship between the nucleotide composition of human  
73 genes and splicing. GC4 content (GC content at 4-fold degenerate sites) correlates  
74 negatively with the number of exons in humans (Figure 1A; Spearman's  $\rho =$   
75  $-0.27$ ;  $p < 2.2 \times 10^{-16}$ ; see also (Carels and Bernardi, 2000; Ressayre et al., 2015;  
76 Savisaar and Hurst, 2016)). In addition, GC4 content is highest in 5'-proximal  
77 exons (Figure 1B; Spearman's  $\rho = -0.18$ ;  $p < 2.2 \times 10^{-16}$ ), and first exons have a  
78 higher GC4 content than second exons ( $p < 2.2 \times 10^{-16}$ , one-tailed Wilcoxon test).  
79 Although these patterns could result from proximity to CpG-rich transcription  
80 start sites (TSSs)(Zhang et al., 2004), we found that first exons have significantly  
81 higher GC4 content than second exons even when controlling for the distance  
82 from the TSS (Figure 1C). This suggests that splicing contributes to the observed  
83 enrichment of G and C nucleotides in the 5'-proximal exons in human.

84

85 To understand the causal links between splicing and nucleotide composition, we  
86 studied the compositional patterns of retrogenes. Retrotransposition provides a

87 natural evolutionary experiment of what happens when a previously spliced  
88 gene suddenly loses its introns. We first analysed a set of 49 parent-retrogene  
89 pairs for which both the parent and the retrocopy ORFs have been retained in  
90 human and mouse. Strikingly, we found that the retrocopies had a significantly  
91 higher GC4 content than their parents (median  $GC4_{\text{retrocopy}} - GC4_{\text{parent}} = 11.5\%$ ;  $p$   
92  $= 2.1 \times 10^{-4}$  from one-tailed Wilcoxon test; Figure 1D). It thus appears that after  
93 retrotransposition, newly integrated intronless genes come under selective  
94 pressure for increased GC content. In a comparison of 31 parent-retrogene pairs  
95 retained between human and macaque, the median GC4 difference is not  
96 significant (0.09%;  $p = 0.13$ , Wilcoxon test), but this may be explained by  
97 duplication events in macaques being more recent ( $dS \sim 0.06$ ) than in mouse ( $dS$   
98  $\sim 0.5$ ) and therefore less evolutionary time has passed to allow changes in GC  
99 composition to have occurred. As a control, we analysed the GC4 content of  
100 retrocopies classed as pseudogenes (Figure S1A) and found it to be significantly  
101 lower compared to their parental genes ( $-2.963\%$ ;  $p < 2.2 \times 10^{-16}$ , Wilcoxon test).  
102 Furthermore, the genomic neighbourhood of functional retrocopies and  
103 pseudogenes had significantly lower GC content than the neighbourhood of their  
104 respective parental genes (Figure S1B). These observations suggest that  
105 increased GC content is not intrinsically connected with retrotransposition, but  
106 is required for maintaining long-term functionality of retrogenes. Taken  
107 together, these results support a splicing-dependent mechanism shaping  
108 conserved patterns of nucleotide composition across functional protein-coding  
109 genes.

110

### 111 **GC-content is a strong predictor of expression of unspliced reporter genes**

112 The above analyses show a connection between splicing and genomic GC content  
113 of endogenous human genes. To test whether splicing differentially affects the  
114 expression of genes depending on their GC content, we designed 22 synonymous  
115 variants of GFP that span a broad range of GC3 content (GC content at the third  
116 positions of codons) (Mittal et al., 2018) (Figure S2). The collection encompasses  
117 most of the variation in GC3 content found among human genes. All variants  
118 were independently designed by randomly drawing each codon from an  
119 appropriate probability distribution, to ensure uniform GC content and statistical

120 independence between sequences. We cloned these variants into two  
121 mammalian expression vectors: an intronless vector with a CMV promoter  
122 (pCM3) and a version of the same vector with a synthetic intron located in the 5'  
123 UTR (pCM4). The GC content profiles of the 5' UTRs were similar in both vectors  
124 (Figure S2E,F). The vectors also encoded a far-red fluorescent protein, mKate2,  
125 which we used to normalize GFP protein abundance (normalization reduced  
126 measurement noise, but similar results were obtained with and without  
127 normalization). Transient transfections of HeLa cells with three independent  
128 preparations of each plasmid showed reproducible expression with a large  
129 dynamic range: synonymous variants differed in GFP protein production 46-fold.  
130 Consistent with previous studies, GFP fluorescence was strongly correlated with  
131 GC3 content, both in spliced and unspliced genes (Figure 2A,B). Interestingly,  
132 introduction of an intron into the 5' UTR increased the expression of most, but  
133 not all variants. Typically, GC-poor variants experienced a large increase of  
134 expression in the presence of an intron, whereas GC-rich variants were  
135 unaffected or experienced a moderate increase (Figure 2C).

136

137 We obtained similar results in stably transfected HeLa and HEK293 cells (Figure  
138 S3) and when expressing an independently designed collection of 25  
139 synonymous variants of mKate2 in HeLa cells (Figure 2D-F, S2D). A Fisher's  
140 exact test revealed that the percentage of variants whose expression was  
141 increased by splicing significantly depended on GC3 content ( $p=0.02$ ,  $N=47$ , GFP  
142 and mKate variants combined). These experiments show that many AT-rich  
143 genetic variants are expressed inefficiently in human cells, but low expression  
144 can be partially rescued by splicing. Notably, the average GC content of the  
145 human genome is 41% (Li, 2011). In our experiments, genes with GC content  
146 below 41% are expressed extremely inefficiently, unless they contain an intron  
147 (Figure 2). This may provide a strong selective pressure for the retention of  
148 introns in many human genes.

149

150 To establish which stages of expression are responsible for this phenomenon, we  
151 first measured mRNA abundance of GFP variants in transiently transfected HeLa  
152 cells by quantitative RT-PCR (qRT-PCR). High GC content may introduce

153 unwanted bias in RT-PCR, so to allow fair comparison of all variants irrespective  
154 of their GC content, qRT-PCR primers were placed in the untranslated regions,  
155 whose sequence did not vary. Similar to protein levels, mRNA abundance varied  
156 widely between synonymous variants of GFP. GC-poor variants experienced a  
157 large increase of expression in the presence of an intron, whereas GC-rich  
158 variants were less affected (Figure 2G-I). The range of variation in mRNA  
159 abundance was much smaller in constructs with an intron than without intron  
160 (Figure 2I), indicating that splicing buffers the effects of GC content on  
161 expression.

162

163 We then asked if changes in mRNA abundance arose at transcriptional or post-  
164 transcriptional levels. As a proxy for transcriptional efficiency, we measured the  
165 abundance of intronic RNA for GFP variants expressed from the intron-  
166 containing plasmid. GC content did not correlate with intronic RNA abundance  
167 (Figure 2J), suggesting that the rate of transcription does not depend on GC  
168 content of the coding sequence found downstream of the intron. Conversely, high  
169 GC content was associated with stabilization in unspliced constructs (Figure 2K).  
170 Taken together, these experiments show that splicing preferentially increases  
171 the expression of GC-poor synonymous variants at a post-transcriptional level.

172

### 173 **High GC content at the 5' end correlates with efficient expression**

174 To further explore the sequence determinants of expression, we assembled a  
175 pool of 217 synonymous variants of GFP that included the 22 variants studied  
176 above, 137 variants from our earlier study (Kudla et al., 2009), and 58 additional  
177 variants. We cloned the collection into plasmids with and without a 5' UTR  
178 intron. We then established pools of HeLa Flp-In T-REx cells that stably express  
179 these constructs from a single genomic locus under a doxycycline-inducible  
180 promoter and measured the protein levels of all variants by Flow-Seq (Kosuri et  
181 al., 2013). We also performed Flow-Seq in HEK293 cells using the intronless  
182 constructs only. In Flow-Seq, a pool of cells is sorted by FACS into bins of  
183 increasing fluorescence and the distribution of variants in each bin is probed by  
184 amplicon sequencing to quantify protein abundance (Figure 3A). All variants  
185 could be quantified with good technical and biological reproducibility and high

186 correlation was found between Flow-Seq and spectrofluorometric measurement  
187 of individual constructs (Figure S4). Most variants showed the expected  
188 unimodal distribution across fluorescence bins, but some variants showed  
189 bimodal distributions, possibly indicative of gene silencing in a fraction of cells.

190

191 All Flow-Seq experiments showed substantial variation of expression between  
192 synonymous variants of GFP (Figure 3B). GFP protein levels in HeLa cells (with  
193 intron), HeLa cells (without intron), and HEK293 cells (without intron) were all  
194 correlated with each other, but the moderate degree of correlation ( $r=0.51$   
195 HEK293 (without intron) vs HeLa (without intron);  $r=0.36$  HeLa (with intron) vs  
196 HeLa (without intron)) suggests that the effects of codon usage on expression are  
197 modulated by splicing and by cell line identity - in agreement with prior  
198 observations of tissue-specific codon usage (Burow et al., 2018; Gingold et al.,  
199 2014; Plotkin et al., 2004; Rudolph et al., 2016). Flow-Seq of unspliced variants in  
200 HeLa and HEK cells confirms the positive correlation of synonymous site GC-  
201 content with expression (Figure 3C). In contrast to the results reported by us and  
202 others in bacteria and yeast (Goodman et al., 2013; Kudla et al., 2009; Shah et al.,  
203 2013), but consistently with the positive correlation between GC content and  
204 expression, strong mRNA folding near the beginning of the coding sequence  
205 correlated with increased expression (Spearman's  $\rho = 0.27$  in HeLa cells;  $\rho = 0.4$   
206 in HEK293 cells). Expression was positively correlated with CpG content and  
207 codon adaptation index (CAI), and negatively correlated with the estimated  
208 density of ARE elements or cryptic splice sites. Because of the strong correlation  
209 between GC content, CpG content, CAI and mRNA folding energy, a multiple  
210 regression analysis could not resolve which of these properties was causally  
211 related to expression. Interestingly, for intron-containing variants, there was no  
212 correlation, or a weak negative correlation, between expression and GC content,  
213 CpG content, CAI, and mRNA folding energy (Figure 3C).

214

215 Some of the variants analysed by Flow-Seq featured large regional variation in  
216 GC content (Figure S5A) and we asked whether the localization of low-GC and  
217 high-GC regions within the coding sequence influences expression. We found  
218 that the GC3 content in the first half of the coding sequence (nt 1-360), but not in



219 the second half (nt 361-720), was positively correlated with expression of  
220 intronless GFP variants in the HeLa and HEK293 cells (Figure 3D). The GC3  
221 content in the first half of the gene showed no correlation with expression in the  
222 intron-containing constructs.

223

224 To further test whether the GC content at the 5' end of genes has a particularly  
225 important effect on expression, we constructed in-frame fusions between GC-  
226 rich and GC-poor variants of GFP and mKate2 genes and quantified their protein  
227 and mRNA abundance in transient transfection experiments. Expression levels  
228 showed a striking dependence on the GC content profile. mKate2\_GCpoor  
229 showed undetectable expression on its own or as a 5'-terminal fusion with GC-  
230 rich GFP, but it was efficiently expressed as a 3'-terminal fusion with GC-rich GFP  
231 (Figure 3E). By contrast, mKate2\_GCrich was efficiently expressed both as 5'-  
232 terminal and 3'-terminal fusion. Analogous experiments with GC-rich and GC-  
233 poor variants of GFP fused to mKate2\_GCrich led to similar conclusions (Figure  
234 S5B). The differences in protein levels between the fusion constructs could be  
235 explained by differences in mRNA abundance (Figure 3E).

236

### 237 **High GC content leads to cytoplasmic enrichment of mRNA and higher** 238 **ribosome association**

239 Using the pooled HeLa cells used in Flow-Seq, we then analysed the effects of GC  
240 content on mRNA localization. We separated the pools into nuclear and  
241 cytoplasmic fractions, isolated RNA and performed amplicon sequencing of each  
242 fraction to analyse mRNA localization of each GFP variant. Analysis of fractions  
243 showed the expected enrichment of the lncRNA MALAT1 in the nucleus, and of  
244 tRNA in the cytoplasm, confirming the quality of fractionations (Figure 4A). For  
245 each GFP variant, we calculated the relative cytoplasmic concentration of its  
246 mRNA (RCC) as the ratio of cytoplasmic read counts to the sum of reads from  
247 both fractions ( $RCC = c_{cyto} / (c_{cyto} + c_{nuc})$ ; Figure 4B). A value of 0 therefore  
248 indicates 100% nuclear retention, whereas a value of 1 indicates 100%  
249 cytoplasmic localisation. In the absence of splicing, RCC scores ranged from 0.09  
250 to 0.64 and RCC correlated significantly with GC content ( $r=0.51$ ,  $p=3.85 \times 10^{-13}$ ,  
251 Figure 4C). In the presence of a 5' UTR intron, we observed a significant increase

252 in RCC score for GFP variants with low GC content, but no increase in RCC for GC-  
253 rich variants (Figure 4D). GC3 content at the beginning of the coding sequence  
254 was significantly correlated with RCC in the absence of splicing ( $r=0.5$ ,  $p=2.0\times 10^{-11}$ ),  
255 but not in the presence of splicing ( $R<0.01$ ,  $p=0.48$ ; Figure S5). Thus, high GC  
256 content at the 5' end of genes increases gene expression in part through  
257 facilitating the cytoplasmic localization of mRNA.

258

259 To assess whether GC content also affects translational dynamics, we performed  
260 polysome profiling on HEK293 GFP pool cells using sucrose gradient  
261 fractionation (Figure 5A). qRT-PCR analyses of RNA extracted from all collected  
262 fractions showed a broad distribution of GFP across fractions, with enrichment  
263 within polysome-associated fractions. In order to determine distribution  
264 patterns of individual GFP variants, RNA from several fractions was pooled (as  
265 indicated in Figure 5B) and subjected to high-throughput sequencing. The  
266 resulting read distribution indicates that GC-rich variants are associated with  
267 denser polysomal fractions (ribosome density, Figure 5C, left panel;  $R^2=0.55$ ,  $p <$   
268  $2.2\times 10^{-16}$ ) and are more likely to be translated (ribosome association, Figure 5C,  
269 right panel;  $R^2=0.28$ ,  $p<9.03\times 10^{-15}$ ), compared to GC-poor variants. This suggests  
270 that enhanced translational dynamics also contribute to more efficient  
271 expression of GC-rich genes.

272

### 273 **The expression fate of endogenous RNA depends on splicing, nucleotide** 274 **composition, and cell type**

275 To test whether splicing- and position-dependent effects of codon usage can also  
276 be observed among human genes, we turned to genome-wide measurements of  
277 expression at endogenous human loci and related these measurements to codon  
278 usage and splicing. Although the correlations between GC content and expression  
279 depended on the experimental measure and type of cells under study, we find  
280 that GC4 content usually has a more positive effect on gene expression in  
281 unspliced genes relative to spliced ones (Figure 6, Table S1). In particular,  
282 unspliced mRNAs show a more positive/less negative correlation of GC4 with  
283 transcription initiation (GRO-cap data); cytoplasmic stability (exosome mutant);  
284 RNA (whole cell RNA-seq); cytoplasmic enrichment (cell fractionation),

285 translation rate (ribosome profiling vs whole cell RNA-seq); and protein amount  
286 (mass-spec). These analyses suggest that GC4 content has an effect on the RNA  
287 abundance of intronless mRNA molecules, which is carried through to the  
288 protein expression. Taken together, these genome-wide analyses support our  
289 observation of a splicing-dependent relationship between codon usage and  
290 expression in human cells.

291

## 292 **Discussion**

293

294 We have shown that the effects of GC content on gene expression in human cells  
295 are splicing-dependent (the effect is larger in unspliced genes compared to  
296 spliced genes) and position-dependent (the effect is larger at the 5' end of genes  
297 than at the 3' end). In addition, human genes show striking patterns of codon  
298 usage, which differ between spliced and unspliced genes and between first and  
299 subsequent exons. Our results have implications for the understanding of the  
300 evolution of human genes and the functional consequences of synonymous  
301 codon usage.

302

### 303 **Mechanisms of splicing- and position-dependent effects of codon usage**

304 Specific patterns of codon usage have previously been found at the 5' ends of  
305 genes in bacteria, yeast and other species (Gu et al., 2010; Kudla et al., 2009;  
306 Tuller et al., 2010). In bacteria and yeast, strong mRNA folding near the start  
307 codon prevents ribosome binding and reduces translation efficiency, resulting in  
308 selection against strongly folded 5' mRNA regions (Kudla et al., 2009; Shah et al.,  
309 2013). In addition a "ramp" of rare codons has been observed near the 5' end of  
310 RNAs in multiple species, with a possible role in preventing a wasteful  
311 accumulation of ribosomes on mRNAs (Tuller et al., 2010) or reducing the  
312 strength of mRNA folding (Bentele et al., 2013). These phenomena cannot  
313 explain our results in human, because both the folding energy and codon ramp  
314 models predict low GC content near the start codon, whereas we observe high GC  
315 content within first exons of human protein-coding genes (Figure 1B).  
316 Furthermore, our experiments show that high GC content near the start codon

317 increases expression, whereas the folding energy and codon ramp models would  
318 predict low expression.

319

320 We propose instead that splicing- and position-dependent effects of GC content  
321 are explained by co-transcriptional or early post-transcriptional events in the  
322 lifetime of an mRNA. Using matched reporter gene libraries, we show that most,  
323 but not all, variants show an increase in expression when spliced. Splicing  
324 typically increases the expression of AT-rich variants, but it does not further  
325 increase the expression of GC-rich transcripts, which suggests that splicing and  
326 high GC content influence expression through at least one common mechanism.  
327 Splicing increases transcription (Kwek et al., 2002), prevents nuclear  
328 degradation (Nott et al., 2003), facilitates nuclear-cytoplasmic mRNA export  
329 through the Aly/REF-TREX pathway (Muller-McNicoll et al., 2016), and  
330 stimulates translation (Nott et al., 2004). High GC content might increase RNA  
331 polymerase processivity (Bauer et al., 2010; Zhou et al., 2016); GC-rich variants  
332 are less likely to contain cryptic polyadenylation sites (consensus sequence:  
333 AAUAAA) or destabilizing AU-Rich Elements (AREs) (Higgs et al., 1983); and high  
334 GC content near the 5' end may also facilitate cytoplasmic localisation of mRNA.  
335 GC-rich sequence elements of endogenous unspliced genes were previously  
336 shown to route transcripts into the splicing-independent ALREX nuclear export  
337 pathway, allowing efficient cytoplasmic accumulation (Palazzo et al., 2007). In  
338 agreement with this, low expression caused by inhibitory sequence features  
339 (such as low GC-content) can be rescued by extending the mRNA at the 5' end  
340 with a GC-rich sequence (Figure 3D,E, Figure S5). This may act as a  
341 compensatory mechanism when gene expression cannot rely on the positive  
342 regulatory effects of splicing (Palazzo and Akef, 2012). In contrast, it was  
343 recently shown that binding of HNRNPK to the GC-rich SIRLOIN motif leads to  
344 nuclear enrichment of lncRNAs (and also some mRNAs) (Lubelsky and Ulitsky,  
345 2018). Our genomic analyses of lncRNA sequences do not show the same  
346 splicing-dependent compositional patterns as observed in mRNAs and it is  
347 therefore likely that antagonistic pathways act simultaneously in shaping the  
348 RNA expression landscape. Thus, we propose that the genomic patterns and their

349 consequences on gene expression reported here are general features of protein-  
350 coding genes.

351

352 Recent studies also highlight patterns of codon usage as major determinants of  
353 RNA stability in yeast (Presnyak et al., 2015), zebrafish (Mishima and Tomari,  
354 2016) and other species (Bazzini et al., 2016). The usage of less common, ‘non-  
355 optimal’ codons within transcripts was shown to control poly-A tail length and  
356 RNA half-life in a translation-dependent manner through the coupled activity of  
357 different CCR4-NOT nucleases (Radhakrishnan et al., 2016; Webster et al., 2018).  
358 Consistent with these findings, we observed that CAI is positively correlated with  
359 mRNA expression levels in human cells. However, it remains to be seen whether  
360 the correlation of CAI with mRNA expression depends on translation. Because of  
361 the strong correlation between GC content and CAI, it is difficult to disentangle  
362 independent contributions of these variables. Additionally, we find that the  
363 correlation between GC content (or CAI) and expression is position- and splicing-  
364 dependent, whereas no evidence for such context-dependence has been reported  
365 for the CCR4-NOT-mediated mechanism.

366

367 Other instances in which the effects of codon usage are context-dependent have  
368 been described. Most notably, tRNA populations and transcriptome codon usage  
369 patterns were shown to differ between mammalian tissues (Dittmar et al., 2006;  
370 Gingold et al., 2014; Plotkin et al., 2004; Rudolph et al., 2016). Intriguingly, genes  
371 preferentially expressed in proliferating cells and tissue-specific genes tend to be  
372 AT-rich, whereas genes expressed in differentiated cell types and housekeeping  
373 genes are more GC-rich (Gingold et al., 2014; Vinogradov, 2003). Although these  
374 differences have been interpreted in terms of the match between codon usage  
375 and cellular tRNA pools, it is plausible that translation-independent mechanisms  
376 contribute to context-dependent effects of codon usage. Accordingly, in  
377 *Drosophila*, codon optimality determines mRNA stability in whole cell embryos,  
378 but not in the nervous system, independent of tRNA abundance (Burow et al.,  
379 2018). Recently, it was shown that Zinc-finger Antiviral Protein (ZAP) selectively  
380 recognises high CpG-containing viral transcripts as a mechanism to distinguish  
381 self from non-self (Takata et al., 2017). We speculate that similar regulatory

382 proteins and mechanisms exist for cellular expressed genes. The cell lines used in  
383 the present study, HeLa and HEK293, are both rapidly proliferating and  
384 experimental results are correlated ( $r=0.36$ , Flow-Seq data), but divergent  
385 expression of some GFP variants was also observed. Similarly, the effect size of  
386 GC content on the expression of endogenously expressed genes varies with cell  
387 type. It would be interesting to compare the expression of our variants in other  
388 cell types to further address the question of tissue-specific codon usage and  
389 adaptation to tRNA pools.

390

### 391 **Implications for the evolution of protein-coding genes**

392 The fact that long, multi-exon genes are often found in GC-poor regions of the  
393 genome might result from regional mutation bias. However, an alternative  
394 explanation is possible: GC-poor genes may be under selective pressure to retain  
395 their introns, and intronless genes may experience selective pressure to increase  
396 their GC content. These possibilities are supported by multiple observations:  
397 Firstly, endogenous intronless genes are on average more GC-rich than intron-  
398 containing genes. Secondly, the GC content of functional (but not non-functional)  
399 retrogenes is higher compared to their respective intron-containing parental  
400 genes, which cannot be explained by a systematic integration bias. Thirdly, in  
401 genome-wide analysis, correlations between GC-content and expression are  
402 generally more positive (or less negative) for unspliced compared to spliced  
403 genes. Taken together, this suggests that for the long-term success of an  
404 unspliced gene (i.e. stable conservation of expression and functionality) an  
405 increase in GC content is essential. By contrast, splicing allows genes to remain  
406 functional even when mutation bias or other mechanisms lead to a decrease of  
407 their GC content.

408

## 409 **Materials and Methods**

410

### 411 **Genes and plasmids**

412 The library of 217 synonymous GFP variants used here consists of 138 variants  
413 from an earlier study (Kudla et al., 2009), 59 new variants assembled using the  
414 same PCR-based method as in (Kudla et al., 2009), and 22 variants that were  
415 designed *in silico* and ordered as synthetic gene fragments (gBlocks) from  
416 Integrated DNA Technologies (IDT) (Mittal et al., 2018). Each of the 22 variants  
417 was designed by setting a target GC3 content (between 25 and 95%) and  
418 randomly replacing each codon with one of its synonymous codons, such that the  
419 expected GC3 content at each codon position corresponded to the target GC3  
420 content. For example, to design a GFP variant with GC3 content of 25%, each  
421 glycine codon was replaced with one of the four synonymous glycine codons  
422 with the following probabilities: GGA, 37.5%; GGC, 12.5%, GGG, 12.5%; GGT,  
423 37.5%. We also generated 23 mKate2 sequences using an analogous procedure  
424 and ordered the variants as gBlocks from IDT. All the genes were cloned into the  
425 Gateway Entry vector pGK3 (Kudla et al., 2009).

426

### 427 **Construction of transient expression vectors**

428 Plasmids used in transient transfection experiments are based on pCI-neo  
429 (Promega), a CMV-driven mammalian expression vector that contains a chimeric  
430 intron upstream of the multiple cloning site (MCS) within the 5'UTR. This intron  
431 consists of the 5' splice donor site from the first intron of the human beta-globin  
432 gene and the branch and 3' splice acceptor site from the intron of  
433 immunoglobulin gene heavy chain variable region (see pCI-neo vector technical  
434 bulletin, Promega). This vector was adapted to be compatible with Gateway  
435 recombination cloning by inserting the Gateway-destination cassette, RfA, using  
436 the unique EcoRV and SmaI restriction sites present within the MCS of pCI-neo,  
437 generating pCM2. This plasmid was then further modified by removing the  
438 intron contained within the 5'UTR by site-directed deletion mutagenesis using  
439 Phusion-Taq (ThermoScientific) and primers 'pCI\_del\_F' and 'pCI\_del\_R' (see  
440 Supplementary Table 2 for list of all primers used), generating plasmid pCM1.

441 To be able to normalise spectrophotometric measurements from single GFP  
442 transfection experiments, pCM1 and pCM2 were further modified to contain a  
443 separate expression cassette driving the expression of a second fluorescent  
444 reporter gene, mKate2. The mKate2 gene cassette from pmKate2-N (Evrogen)  
445 was inserted via Gibson assembly cloning: First, the entire mKate2 expression  
446 cassette was amplified using primers 'mKate2\_gibs\_F' and 'mKate2\_gibs\_R' which  
447 add overhangs homologous to the pCM insertion site. Next, pCM1 and pCM2  
448 were linearised by PCR using primers 'pCI\_gib\_F' and 'pCI\_gib\_R'. All PCR  
449 products were purified using the Qiagen PCR purification kit and fragments with  
450 homologous sites recombined using the Gibson assembly cloning kit (NEB)  
451 according to manufacturer's instructions (NEB). Successful integration was  
452 validated by Sanger sequencing. This generated plasmids pCM3 (-intron,  
453 +mKate2) and pCM4 (+intron, +mKate2).

454

#### 455 **Transient plasmid transfections for spectrofluorometric measurements**

456 Plasmids for transient expression of fluorescent genes were transfected into  
457 HeLa cells grown in 96-well plates. Per plasmid construct, 3 technical replicates  
458 were tested by reverse transfection. Enough transfection mix for 4 wells was  
459 prepared by diluting 280ng plasmid DNA in 40ul OptiMem (Gibco). 1ul  
460 Lipofectamine2000 (Invitrogen; 0.25ul per well) was diluted in 40ul OptiMem  
461 and incubated for 5min at room temperature. Both plasmid and  
462 Lipofectamine2000 dilutions were then mixed (80ul total volume) and further  
463 incubated for 20-30min. 20ul of transfection complex was then pipetted into 3  
464 wells before adding 200ul of HeLa cell suspension (45,000 cells/ml; 9,000  
465 cells/well) in phenol red-free DMEM (Biochrom, F0475). Media was exchanged  
466 3-4h post-transfection to reduce toxicity. Cells were then grown for a further 24h  
467 or 48h at 37C, 5% CO<sub>2</sub>.

468 After incubation, cells were lysed by removing media and adding 200ul of cell  
469 lysis buffer (25mM Tris, pH 7.4, 150mM NaCl, 1% Triton X-100, 1mM EDTA, pH  
470 8). Fluorescence readings were obtained using a Tecan Infinite M200pro  
471 multimode plate reader. The plate was first incubated under gentle shaking for  
472 15min followed by fluorescence measurements using the following settings:



473 Ex486nm/Em 515nm for GFP and Ex588nm/Em633nm for mKate2; reading  
474 mode: bottom; number of reads: 10 per well; gain: optimal.

475 For data analysis, measurements of untransfected cells were subtracted as  
476 background from all other wells. For comparability of different plates within a  
477 set of experiments, the same 3 genes were transfected on every plate to account  
478 for technical variability. In the screen of individual GFP variants (see Figure 2),  
479 GFP measurements were divided by mKate2 measurements from same wells to  
480 reduce noise caused by well-to-well variation in transfection efficiency, but  
481 similar results were obtained without normalisation.

482

### 483 **Transient transfections and RNA extraction for qRT-PCR analysis**

484 HeLa cells were reverse transfected in 12-well plates using 800ng plasmid DNA  
485 and 2ul Lipofectamine 2000 (Invitrogen). DNA and Lipofectamine 2000 were  
486 diluted in 100ul OptiMEM (Gibco) each, incubated for 5min, mixed and further  
487 incubated for 20min. The transfection complex was then added to each well  
488 before adding  $10^5$  HeLa cells. Cells were incubated for 24h at 37C, 5% CO<sub>2</sub> before  
489 harvesting. Cells were then harvested by adding 1ml Trizol reagent (Life  
490 technologies). RNA was extracted according to manufacturer's instructions.  
491 Resulting RNA was further treated with DNase I using the Turbo DNase kit  
492 (Ambion) to remove any residual plasmid and genomic DNA.

493

### 494 **qRT-PCR analysis**

495 cDNA for qRT-PCR analysis was prepared using SuperScript III Reverse  
496 Transcriptase (Life technologies) according to the manufacturer's  
497 recommendations with 500ng total RNA as template and 500ng random  
498 hexamers (Promega). All qRT-PCRs were carried out on a Roche LightCycler 480  
499 using Roche LightCycler480 SYBR Green I Master Mix and 0.3uM gene-specific  
500 primers. Samples were analysed in triplicate as 20ul reactions, using 2ul of  
501 diluted cDNA. Cycling settings: DNA was first denatured for 5min at 95°C before  
502 entering a cycle (50-60x) of denaturing for 10sec at 95°C, annealing for 7sec at  
503 55-60°C (depending on primers used), extension for 10sec at 72°C and data  
504 acquisition. DNA was then gradually heated up by 2.20 °C/s from 65 to 95°C for  
505 5sec each and data continuously collected (Melting curve analysis). Data was

506 evaluated using the comparative Ct method (Livak and Schmittgen, 2001). RNA  
507 measurements from transient transfection experiments were normalised to the  
508 abundance of neomycin RNA, which is expressed from the same plasmid, to  
509 control for differences in transfection efficiency (primers 'Neo\_F' and 'Neo\_R').

510

### 511 **Subcellular fractionation**

512 This protocol is based on the cellular fractionation protocol published by  
513 (Gagnon et al., 2014) but includes a further clean-up step using a sucrose cushion  
514 as described by (Zaghlool et al., 2013) and a second lysis step as described by  
515 (Wang et al., 2006). Cell lysis and nuclear integrity was monitored throughout by  
516 light microscopy following Trypan blue staining (Sigma). Cells were grown in  
517 10cm plates for 24h to about 90% confluency. Cells were then washed with PBS  
518 and trypsinised briefly using 1ml of 1xTrypsin/EDTA. After stopping the reaction  
519 with 5ml DMEM, cells were transferred into 15ml falcon tubes and collected by  
520 spinning at 100g for 5min. Resulting cell pellets were resuspended in 500ul ice-  
521 cold PBS, transferred into 1.5ml reaction tubes and spun at 500g for 5min, 4°C.  
522 The supernatant was discarded and cells resuspended in 250ul HLB (10mM Tris  
523 (pH 7.5), 10mM NaCl, 3mM MgCl<sub>2</sub>, 0.5% (v/v) NP40, 10% (v/v) Glycerol, 0.32M  
524 sucrose) containing 10% RNase inhibitors (RNasin Plus, Life Tech) by gently  
525 vortexing. Samples were then incubated on ice for 10min. After incubation,  
526 samples were vortexed gently, spun at 1000g for 3min, 4°C, and supernatants  
527 and pellets were processed separately as indicated in a) and b) below.

#### 528 a) Cytoplasmic extract:

529 The supernatant was carefully layered over 250ul of a 1.6M sucrose cushion and  
530 spun at 21,000g for 5min. The supernatant was then transferred into a fresh  
531 1.5ml tube and 1ml Trizol was added and mixed by vortexing.

#### 532 b) Nuclear extract:

533 The pellets were washed 3 times with HLB containing RNase inhibitors by gently  
534 pipetting up and down 10 times followed by a spin at 300g for 2min. After the  
535 3rd wash, nuclei were resuspended in 250ul HLB and 25ul (10%) of detergent  
536 mix (3.3% (wt/wt) sodium deoxycholate/6.6% (vol/vol) Tween 40) dropwise  
537 added while vortexing slowly (600rpm). Nuclei were then incubated for 5min on  
538 ice before spinning at 500g for 2min. The supernatant was discarded and pellets

539 resuspended in 1ml Trizol (Ambion) by vortexing. 10ul 0.5M EDTA are added to  
540 each nuclear sample in Trizol and tubes heated to 65°C for 10min to disrupt very  
541 strong Protein-RNA and DNA-RNA interactions. Tubes were then left to reach  
542 room temperature and RNA was extracted following the manufacturer's  
543 instructions.

544

#### 545 **Transcription inhibition assay**

546 HeLa T-Rex Flp-in cell lines were grown to 80-90% confluency in 6 well for 24h  
547 before treatment with 500nM Triptolide (Sigma). Cells were harvested at  
548 indicated time points and RNA extracted using Trizol reagent (Ambion). Control  
549 cells were treated with the equal volume of DMSO (drug carrier). To assess  
550 transcript levels, qRT-PCR was performed as described above. GFP levels were  
551 normalised to levels of 7SK, a RNA polymerase III-transcribed non-coding RNA,  
552 whose expression levels are not affected by Triptolide treatment. Relative  
553 transcript levels of c-Myc are shown as an example of a relatively unstable  
554 transcript.

555

#### 556 **Generation of stable Flp-in cell lines**

557 We adopted a multiplex-Gateway integration method to create a pool of 217 GFP  
558 plasmids which are compatible with the T-Rex Flp-in system (Invitrogen) for  
559 creating stable, doxycycline-inducible cell lines, in which each variant is  
560 expressed from the same genomic locus, allowing direct comparison of  
561 expression levels.

562 pcDNA5/FRT/TO/DEST (Aleksandra Helwak, University of Edinburgh) contains  
563 the Gateway-compatible attB destination cassette to allow the subcloning of  
564 genes from any Gateway-entry vectors. This plasmid was further modified to  
565 contain the same 5'UTR intron sequence as in pCM4 used in transient expression  
566 experiments using Gibson Assembly (NEB): the intronic sequence was amplified  
567 from pCM4 by PCR using primers 'Gib\_intr\_F' and 'Gib\_intr\_R' using Q5 High-  
568 Fidelity Polymerase (NEB). The primers added 15nt overhangs which are  
569 homologous to the ends of pcDNA5/FRT/TO/DEST when linearised with AflII.  
570 The Gibson assembly reaction was performed as per manufacturer's instructions  
571 (NEB), generating pcDNA5/FRT/TO/DEST/INT.

572 217 individual GFP variants stored in Gateway-entry vector pGK3 were mixed  
573 with a concentration of 0.06ng of each GFP variant. For each pcDNA5 destination  
574 vector, a separate Gateway LR reaction was set-up in a total volume of 45ul using  
575 500ng destination vector, 5ul LR Clonase enzyme mix, 38ul of the mixed 217  
576 pGK3-GFP plasmids and TE (pH 8). The reactions were incubated at 25C  
577 overnight followed by Proteinase K digest (5ul, LR Clonase kit) for 10min at 37C.  
578 The total 50ul reaction mix was transformed into 2.5ml highly competent  
579 DH5alpha in a 15ml Falcon tube by heat-shocking cells for 2min 30s at 42C,  
580 followed by cooling on ice for 3min, before adding 10ml SOC medium and  
581 incubating while shaking for 1h at 37C. After incubation, cells were spun down at  
582 3000g for 3min and resulting bacterial pellets resuspended in 1ml fresh SOC.  
583 10x100ul were plated onto L-Ampicillin agar plates and incubated overnight at  
584 37C resulting in >800 colonies per plate. Bacterial colonies were scraped off the  
585 plates and collected in a falcon tube. Plasmid DNA was extracted using a Qiagen  
586 Midiprep kit according to the manufacturer's instructions, resulting in two  
587 plasmid pools: pCDNA5/GFPpool and pCDNA5/INT/GFPpool. Both pools were  
588 subjected to high-throughput sequencing to confirm the presence of different  
589 GFP variants.

590 HeLa T-Rex Flp-in cells (gifted by the Andrew Jackson lab, The University of  
591 Edinburgh) and Hek293 T-Rex Flp-in (Thermo Scientific) were grown to 80%  
592 confluency in 6 well plates. For GFP plasmid pool transfections,  
593 pCDNA5/GFPpool or pCDNA5/INT/GFPpool were mixed in a 9:1 ratio with the  
594 Flp-recombinase expression plasmid pOG44 (Invitrogen) to give 2ug in total  
595 (1.8ug pOG44 + 0.2ug pCDNA5) and diluted in OptiMEM (Gibco) to 100ul.  
596 Transfections were performed with 9ul Lipofectamine2000 (Invitrogen) and  
597 91ul OptiMEM per well by incubating 5min at room temperature before mixing  
598 with plasmid DNA and a further 15min incubation. The transfection mix was  
599 then added dropwise to the cells. Media were replaced with conditioned media  
600 4h post-transfection. Cells were incubated for further 48h before chemical  
601 selection to select for successful gene integration using 10ng/ul Blasticidin S  
602 (ThermoFisher) and 400mg/ml (HeLa T-Rex Flp-in) or 100mg/ml (Hek293 T-  
603 Rex Flp-in) Hygromycin B (Life Technologies). Successful selection was  
604 determined by monitoring cell death in untransfected cells. Chemically resistant

605 cells represent pools of cell lines expressing different GFP variants from the  
606 same genomic locus. High-throughput sequencing of the GFP integration site  
607 within each generated cell line pool confirmed the successful integration of all  
608 variants.

609 HeLa T-Rex Flp-in and Hek293 T-Rex Flp-in cell lines expressing two individual  
610 GFP variants (GC3=96% and GC3=36%; see Supplementary Figure 3) as spliced  
611 and unspliced transcripts were generated using the same protocol.

612

### 613 **Flow-Seq: FACS sorting and genomic DNA extraction**

614 80x15cm cell culture plates of HeLa T-Rex Flp-in GFP pool cells and 40x15cm cell  
615 culture plates of Hek293 T-Rex Flp-in GFP pool cells were induced with 1ug/ml  
616 Doxycycline (Sigma, D9891) in phenol red-free DMEM (Biochrom, F0475)  
617 supplemented with 10% FCS (Sigma, F-7524) and 2mM L-Glutamine. After 24h  
618 or 48h, cells were harvested by gentle trypsinisation and cells were sorted into 8  
619 fluorescence bins using a BD FACS Aria II cell sorter. To define the range of GFP  
620 positive signal, cells without stable GFP expression were used as negative  
621 control. 80% of HeLa and 90% Hek293 GFP pool cells fell into the GFP-positive  
622 range. Each fluorescence bin was chosen to comprise roughly 10% of the GFP-  
623 positive population. The bin spacing was kept the same for the sorting of HeLa  
624 cell pools expressing unspliced and spliced GFP variants to allow direct  
625 comparisons of the fluorescence profiles of individual variants.

626 About  $10^7$  cells per bin were collected in Polypropylene collection tubes (Falcon)  
627 coated with 1% BSA/PBS, cushioned with 200ul 20%FBS/PBS. Cell suspensions  
628 were decanted into 15ml tubes and cells collected by spinning 5min at 500g. The  
629 supernatant was transferred into fresh 15ml tubes and precipitated using 2  
630 volumes of 100% EtOH/0.1 volume Sodium Acetate (pH 5.3) and 10ul Glycoblue  
631 (Ambion). Tubes were shaken vigorously for 10s before incubating at -20C for  
632 15min, followed by spinning at 3000g for 20min. Resulting pellets were air-  
633 dried, resuspended in 1ml digest buffer (100mM Tris pH 8.5, 5mM EDTA, 0.2%  
634 SDS, 200mM NaCl) and then combined with the respective cell pellet. 10ul RNase  
635 A (Qiagen, 70U) was added and samples gently rotated at 37C. After 1h, 1ul/ml  
636 Proteinase K (20mg/ml, Roche) was added to the samples before rotating a  
637 further 2h at 55C. Genomic DNA was purified 3 times by using 1 volume

638 | Phenol:Chloroform:Isoamyl alcohol (PCI, 25:24:1, Sigma). After each addition of  
639 PCI, samples were shaken vigorously for 10s before spinning at 3000g for 20min  
640 (first extraction) or 5min (all following). The resulting bottom layers including  
641 the interphase were removed before each PCI addition. After the last PCI  
642 extraction, the upper layer was transferred into a fresh 15ml tube and 1  
643 extraction performed using 1 volume chloroform:isoamyl alcohol (CI,24:1,  
644 Sigma). After a 5min spin at 3000g, the upper layer was transferred into a fresh  
645 15ml tube and DNA precipitated using EtOH/Sodium Acetate as before. After a  
646 5min incubation on ice, DNA was collected by spinning for 30min at 3000g. The  
647 resulting DNA pellets were washed 2 times with 75% EtOH before air-drying and  
648 resuspending in 200ul Tris-EDTA (10mM). The quality of the extracted genomic  
649 DNA was assessed on a 0.8% Agarose/TBE gel.

650

### 651 **Polysome profiling**

652 Hek293 Flp-in GFP pool cell lines were grown to 90% confluency on 15cm  
653 dishes. Cells were treated for 20min with 100ug/ul Cycloheximide before  
654 harvesting cells by removing media, washing with 2x ice-cold PBS followed by  
655 scraping cells into 1ml PBS and transferring into 1.5ml tubes. Cells were pelleted  
656 at 7000rpm, 4°C for 1min and resulting cell pellet carefully resuspended by  
657 pipetting up and down in 250ul RSB (10x RSB: 200mM Tris (pH 7.5), 1M KCl,  
658 100mM MgCl<sub>2</sub>) containing 1/40 RNasin (40U/ul, Promega), until no clumps  
659 were visible. 250ul of polysome extraction buffer was then added (1ml 10x RSB  
660 + 50ul NP-40 (Sigma) + 9ml H<sub>2</sub>O + 1 complete mini EDTA-free protease inhibitor  
661 pill (Roche)) and lysate passed 5x through a 25G needle avoiding bubble  
662 formation. The lysate was then incubated on ice for 10min before spinning  
663 10min at 10,000g, 4°C. The supernatant was then transferred into a fresh 1.5ml  
664 tube and the RNA concentration estimated by measuring the OD at 260nm.  
665 Sucrose gradients (10–45%) containing 20 mM Tris, pH 7.5, 10 mM MgCl<sub>2</sub>, and  
666 100 mM KCl were made using the BioComp gradient master. 100ug of Lysate  
667 were loaded on sucrose gradients and spun at 41,000rpm for 2.5h in a Sorvall  
668 centrifuge with a SW41Ti rotor. Following centrifugation, gradients were  
669 fractionated using a BioComp gradient station model 153 (BioComp 23

670 Instruments, New Brunswick, Canada) by measuring cytosolic RNA at 254 nm  
671 and collecting 18 fractions.

672 RNA from all fractions was precipitated using 1 volume of 100% EtOH and 1ul  
673 Glycoblue (Ambion), before extracting RNA using the Trizol method (Life  
674 Technologies). Equal volumes of RNA of each fraction was run on a 1.3%  
675 Agarose/TBE gel to assess the quality of fractionation and RNA integrity.  
676 Additionally, equal volumes of RNA of each fraction were used in cDNA synthesis  
677 using SuperScript III (ThermoFisher) and 2uM gene-specific primers for GFP  
678 ('pcDNA5-UTR\_R') and GAPDH ('GAPDH\_R') followed by qRT-PCR analysis. For  
679 high-throughput sequencing, total RNA from collected fractions was combined in  
680 equal volumes into 4 pools (as indicated in Figure 5B; free ribonucleoprotein  
681 (RNP) complexes, monosomes, light polysomes (2-4) and heavy polysomes (5+))  
682 before amplicon library preparation (as described below).

683

#### 684 **High-throughput library preparation and sequencing**

685 Sequencing libraries were generated by PCR using primers specific for GFP  
686 amplification (Supplementary Table 2) which carry the required adaptor  
687 sequences for paired-end MiSeq sequencing, as well as 6nt indices for library  
688 multiplexing. Between 6-10ug of total genomic DNA were used in multiple PCR  
689 reactions (200ng per 50ul reaction). All PCRs were performed using Accuprime  
690 Pfx (NEB) according to manufacturer's recommendations using 0.4ul Accuprime  
691 Pfx Polymerase and 0.3uM of each primer ('PE\_PCR\_left' and  
692 'S\_indexX\_right\_PEPfCR'). The cycling conditions were as follows: Initial  
693 denaturation at 95C for 2min, followed by 30 cycles of denaturation at 95C for  
694 15sec, annealing at 51C for 30sec, extension at 68C for 1min. The final extension  
695 was performed at 68C for 2min. After PCR, all reactions of the same template  
696 were pooled and 1/3 of the reaction purified using the Qiagen PCR purification  
697 kit according to the manufacturer's instructions. DNA was eluted in 50ul H<sub>2</sub>O.  
698 Library size selection was performed using the Invitrogen E-gel system  
699 (Clonewell gels, 0.8% agarose) followed by Qiagen MinElute PCR purification.  
700 Correct fragment sizes were confirmed and quantified using the Agilent  
701 Bioanalyzer 2100 system.

702 For library preparation of RNA samples, 500ng RNA was first converted into  
703 cDNA using 2nmol GFP-specific primers ('S\_indexX\_right\_PEPCR') using  
704 SuperScript III (Life technologies) according to manufacturer's protocol, using  
705 50C as extension temperature. Resulting cDNA was then treated with 1ul  
706 RNaseH (NEB) for 20min at 37C, followed by heat inactivation at 65C for 5min.  
707 Samples were diluted 1:2.5 before using 2ul as template in PCR for library  
708 preparation. A minimum of 8x50ul PCR reactions were set up and pooled for  
709 each sample before PCR purification, followed by E-gel purification as described  
710 above.

711 High-throughput sequencing was conducted by Edinburgh Genomics (The  
712 University of Edinburgh) and Imperial BRC Genomics facility (Imperial College  
713 London) using the Illumina MiSeq platform (2x300nt paired-end reads).

714

#### 715 **Analysis of GFP pool experiments**

716 Raw sequencing files (fastq files) were demultiplexed by 6nt indices by the  
717 respective sequencing facility. To remove the plasmid sequence, the second  
718 reads from paired-end sequencing were trimmed using flexbar (-as  
719 ATGTGCAGGGCCGGAATTCTTA -ao 4 -m 15 -u 30). Reads were then mapped to  
720 the GFP library using bowtie2 (-X 750) and filtered using samtools (-f 99).

721 For Flow-seq data, only variants with a minimum of 1000 reads across all 8  
722 sequencing bins were used for further analysis. For each GFP variant, the  
723 number of reads in each bin ( $n(i)$ ) was multiplied by the respective bin index ( $i$ )  
724 before taking the sum and dividing by the total number of reads across all bins:

$$725 \text{ Fluorescence (variant)} = \sum_{i=1}^8 i * n(i) / \sum_{i=1}^8 n(i)$$

726 For cell fractionation experiments, only data with a minimum of 1000 reads  
727 across both cytoplasmic and nuclear fractions was used to calculate the relative  
728 cytoplasmic concentration ('RCC') for each variant:  $RCC = \frac{n(cyto)}{n(cyto)+n(nuc)}$

729 For polysome profiling, only variants with a minimum of 1000 reads across all 4  
730 sequencing bins were used for further analysis. To estimate ribosome density,  
731 for each GFP variant, the number of reads in each bin ( $n(i)$ ) was multiplied by the  
732 respective polysomal fraction index ( $i$ ) before taking the sum and dividing by the  
733 total sum of reads across all fractions:



734 Ribosome density(variant) =  $\sum_{i=1}^4 i * n(i) / \sum_{i=1}^4 n(i)$

735 Ribosome association for each variant was calculated as the sum of reads (n) in  
736 light polysomes, heavy polysomes and monosomal fractions, divided by the sum  
737 of reads found in the free RNP fraction:

738 Ribosome association(variant) = ( n(monosomes) + n(light polysomes) +  
739 n(heavy polysomes)) / n(free RNPs)

740

#### 741 **Definition of calculated sequence features**

742 GC3: GC content in the third position of codons

743 CpG: number of CpG dinucleotides

744 dG: The minimum free energy of predicted mRNA secondary structure around  
745 the start codon was calculated using the hybrid-ss-min program version 3.8  
746 (default settings: NA = RNA, t = 37, [Na+] = 1, [Mg++] = 0, maxloop = 30, prefilter  
747 = 2/2) in the 42-nt window (-4 to 38) as in (Kudla et al., 2009).

748 CAI: Codon Adaptation Index (*H. sapiens*) (Sharp and Li, 1987a) was calculated  
749 using a reference list of highly expressed human genes collected from the EMBL-  
750 EBI expression atlas <https://www.ebi.ac.uk/gxa>.

751 tAI: tRNA adaptation index (dos Reis et al., 2004)

752 ARE: top score of ATTTA motif match in each sequence.

753 AT-stretch: number of times motif (AT){9} was identified in each sequence.

754 GC-stretch: number of times motif (GC){9} was identified in each sequence.

755 Poly\_A: number of times the position-specific scoring matrix  
756 ((47,3,0,50)(18,6,9,67)(53,12,12,23)(59,6,0,35)(70,6,6,18)) was identified in  
757 each sequence.

758 SD\_cryptic: number of times RSGTNNHT motif was identified in each sequence.

759 SD\_PSSM: number of times the position-specific scoring matrix  
760 ((60,13,13,14)(9,3,80,7)(0,0,100,0)(0,0,0,100)(53,3,42,3)(71,8,12,9)(7,6,81,6)(1  
761 6,17,21,46)) was identified in each sequence.

762

763 FIMO (<http://meme-suite.org>) was calculated to identify and count sequence  
764 motifs. Open-source packages available for R were used for generating  
765 correlation matrices (corrplot), heatmaps (ggplot2), boxplots

766 (graphics/ggplot2), The GC3 of all human coding sequences (assembly:  
767 GRCg38\_hg38; only CDS exons) was calculated using R package 'seqinr'.

768

## 769 **Computation methods for analysis of endogenous gene expression**

### 770 **Data Collection – see also Supplementary Table 1**

771 1. GC4 content was calculated for each protein-coding transcript annotated  
772 in GENCODE version 19 as the GC content of the third codon position  
773 across all fourfold-degenerate codons (CT\*, GT\*, TC\*, CC\*, AC\*, GC\*, GA\*,  
774 CC\*, GC\*). The core promoter of each transcript is further defined as -300  
775 bp/+100 bp around the annotated TSS.

776 2. The level of transcription initiation was quantified in K562 and Gm12878  
777 cells as the number of GRO-cap reads from the same strand which overlap  
778 the core promoter.

779 3. Nuclear stability was assessed using CAGE data obtained in triplicate from  
780 Egfp, Mtr4 and Rrp40 knockdowns (GSE62047; (Andersson et al., 2014)).  
781 Similarly to the approach used for the GRO-cap data, we calculated the  
782 RPKM across core promoters for each library separately. The baseMean  
783 expression for each treatment was quantified using DESeq2, where  
784 promoters with no reads across any replicate were first removed from  
785 each comparison. Nuclear stability was then assessed as the fold-change  
786 between the Egfp and Mtr4 knockdown and cytoplasmic stability by the  
787 estimated fold-change between the Mtr4 and Rrp40 knockdowns.

788 4. The level of the mature mRNA was quantified using RNA-seq libraries  
789 from whole cell samples (prepared as described elsewhere for HEK293  
790 cells and downloaded from  
791 <http://hgdownload.cse.ucsc.edu/goldenPath/hg19/encodeDCC/wgEncodeCshlLongRnaSeq> for Gm12878, HepG2, HeLa, Huvec and K562 cells).  
792 Reads were pseudoaligned against GENCODE transcript models using  
793 Kallisto, set with 100 bootstraps. All other parameters were left at their  
794 default. Transcript expressions were extracted as the estimated TPM  
795 (tags per million) values.  
796

- 797 5. The level of the mature mRNA in the nuclear and cytoplasmic fractions  
798 was quantified using Kallisto as previously. As transcript stability was  
799 similar in both fractions (linear regression coefficient 0.97,  $p < 2.2 \times 10^{-16}$ ),  
800 nuclear export was determined as the fraction TPM from these two  
801 compartments which was present in the nuclear fraction.
- 802 6. Ribosome-sequencing data from HEK293 (GSE94460) and HeLa  
803 (GSE79664) cells were used to quantify the level of mRNA translation in  
804 these two cells. Both of these measures were determined at the gene level,  
805 and so these observations were applied to all GENCODE transcripts  
806 annotated to these associated genes. These data were normalised to the  
807 mean mRNA expression in the relevant cell types (from step 4).
- 808 7. Protein expression was assessed using mass-spectrometry data (Geiger et  
809 al., 2012) (Supp. Table 2) as the mean LFQ intensity across three  
810 replicates for each uniprot-annotated gene in each cell line for which data  
811 were available. Only data from genes where the UniProt ID is uniquely  
812 linked to a single transcript were considered in the analyses presented  
813 here.
- 814 8. Protein stability was calculated as the level of the mature protein in  
815 HEK293 and HeLa cells (step 7) relative to the mean rate of mRNA  
816 translation in these cells (step 6).

### 817 **Regression modelling**

818 A pseudocount of 0.0001 was added to each measurement of gene expression  
819 and, excluding the nuclear export data, these values were then log<sub>2</sub>-transformed  
820 to generate a normal distribution of expression for subsequent analysis.  
821 Transcripts with an expression value of 0 were removed from downstream  
822 analysis and the resulting distributions used for regression analysis are  
823 displayed in Supplementary Figure 6. Transcripts were separated into unspliced  
824 and spliced, where splicing was defined as containing more than one exon in the  
825 GENCODE transcript model. Expression measurements were then linearly  
826 regressed against the GC4 content separately for each class of transcript and the  
827 coefficients along with their associated standard errors. These data were then

828 bootstrapped by sampling with replacement and recalculating the regression  
829 coefficients for spliced and unspliced transcripts. The 95% confidence interval of  
830 these coefficients (discounting the standard error in these estimations) obtained  
831 by 1,000 samplings of this type was used to draw the ellipses shown in Figure 6.

832

### 833 **Analysis of GC content variation in the human genome**

834 The GRCh38 sequence of the human genome, as well as the corresponding gene  
835 annotations (Ensembl release 85), was retrieved from the Ensembl FTP site  
836 (Zerbino et al., 2018). The full coding sequences (CDSs) of protein-coding genes  
837 were extracted, filtered for quality and clustered into putative paralogous  
838 families (see (Savisaar and Hurst, 2016) for full details). For all analyses, a  
839 random member was picked from each putative paralogous cluster. In addition,  
840 only one transcript isoform (the longest) was considered from each gene. Note  
841 that exon rank was always counted from the first exon of the gene, even if it was  
842 not coding. For Figure 1C, GC4 was averaged across all sites that were at the  
843 same nucleotide distance to the TSS and within an exon of the same rank. For the  
844 functional retrocopies analysis, the parent-retrocopy genes derived in (Parmley  
845 et al., 2007) were used. Pseudogenic retrocopies were retrieved from  
846 RetrogeneDB (Rosikiewicz et al., 2017). Retrocopy annotations were filtered to  
847 only leave human genes with a one-to-one ortholog in *Macaca mulatta*. Next,  
848 only ortholog pairs where both the human and the macaque copy were  
849 annotated as not having an intact reading frame and where the human copy was  
850 annotated as *KNOWN\_PSEUDOGENE* were retained. For the analyses reported in  
851 Supplementary Figure 1, the functional retrocopies were also retrieved from  
852 RetrogeneDB, as we could not access genomic locations for the (Parmley et al.,  
853 2007) set. The functional retrogenes were retrieved similarly to pseudogenes,  
854 except that both the human and the macaque copy were required to have an  
855 intact open reading frame and the human copy could not be annotated as  
856 *KNOWN\_PSEUDOGENE*.

857 Python 3.4.2. was used for data processing and R 3.1.2 was used for statistics and  
858 plotting (R Development Core Team, 2005).

859

### 860 **Acknowledgments**

861 We thank Elisabeth Freyer for help with cell sorting; Andrew Jackson, Nick  
862 Gilbert and Aleksandra Helwak for gifts of cell lines and plasmids; James Brindle  
863 for technical assistance; Michael Liss and members of Kudla and Hurst groups for  
864 discussions; Edinburgh Genomics (University of Edinburgh) and the Imperial  
865 BRC Genomics facility for next-generation sequencing; and Institute of Genetics  
866 and Molecular Medicine technical support for help with media preparation and  
867 sequencing. This work was supported by the Wellcome Trust (Fellowships  
868 097383 and 207507 to G.K.), the European Research Council (Advanced grant  
869 ERC-2014-ADG 669207 to L.D.H.), and the Medical Research Council (Grants  
870 MC\_UU\_00007/11 to M.S.T. and MC\_UU\_00007/12 to G.K. and PhD studentship to  
871 C.M.).

872

873

874

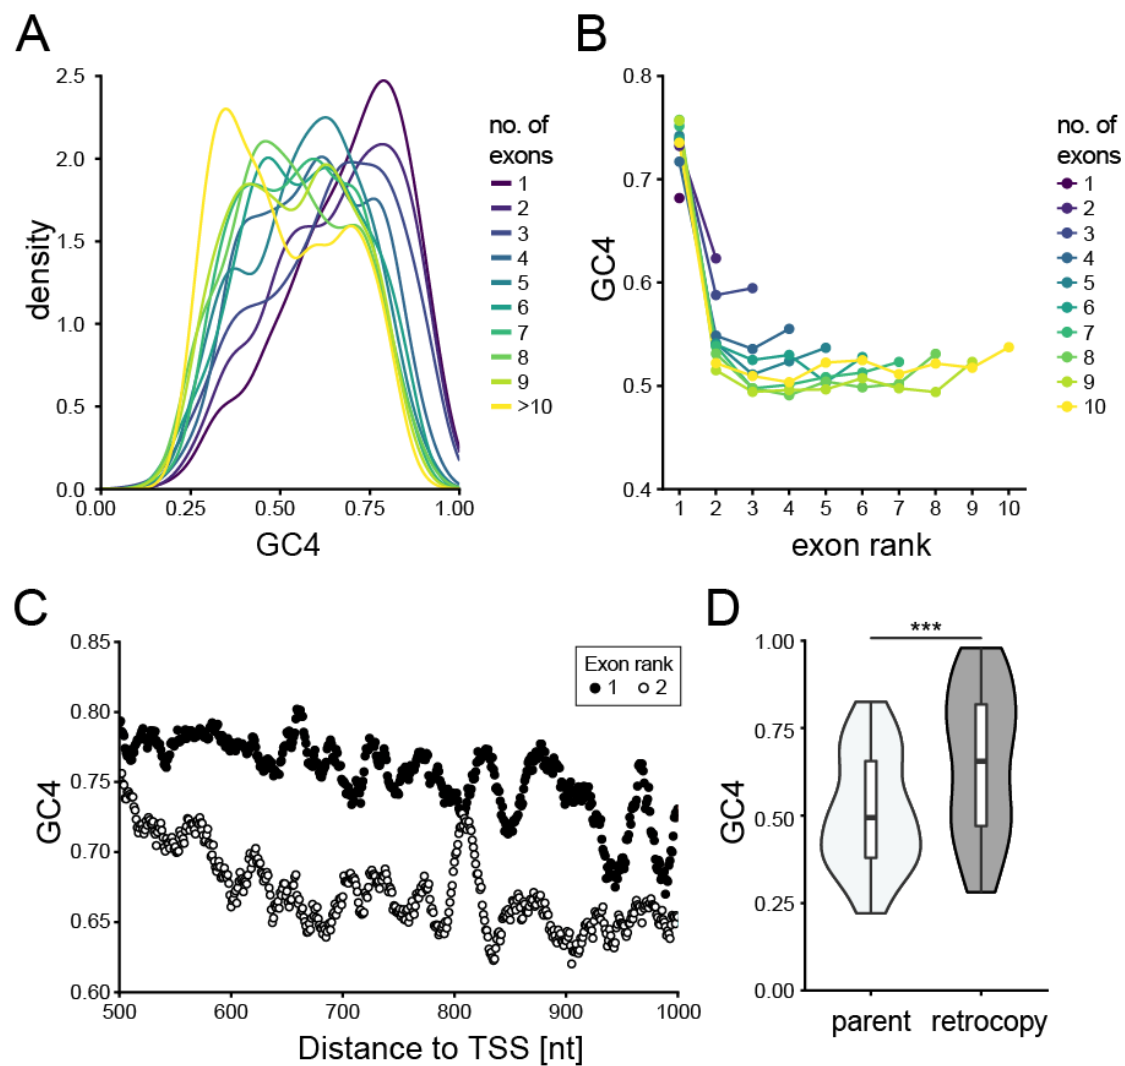

875

876

877 **Figure 1. Splicing- and position-dependent patterns of nucleotide**  
878 **composition in human genes**

879 (A) GC4 distribution of human protein-coding genes, grouped by number of  
880 exons per gene.

881 (B) Mean GC4 content in protein-coding exons, grouped by exon position (rank)  
882 and by number of exons per gene.

883 (C) Mean GC4 for individual codons within exons of rank 1 (black dots) or rank 2  
884 (white dots) downstream of the transcription start site (TSS).

885 (D) GC4 distribution of functional retrogenes (dark grey) and their  
886 corresponding parental genes (light grey) conserved between mouse and human  
887 ( $p=2.1 \times 10^{-4}$ , from one-tailed Wilcoxon signed rank test,  $n=49$ ).

888

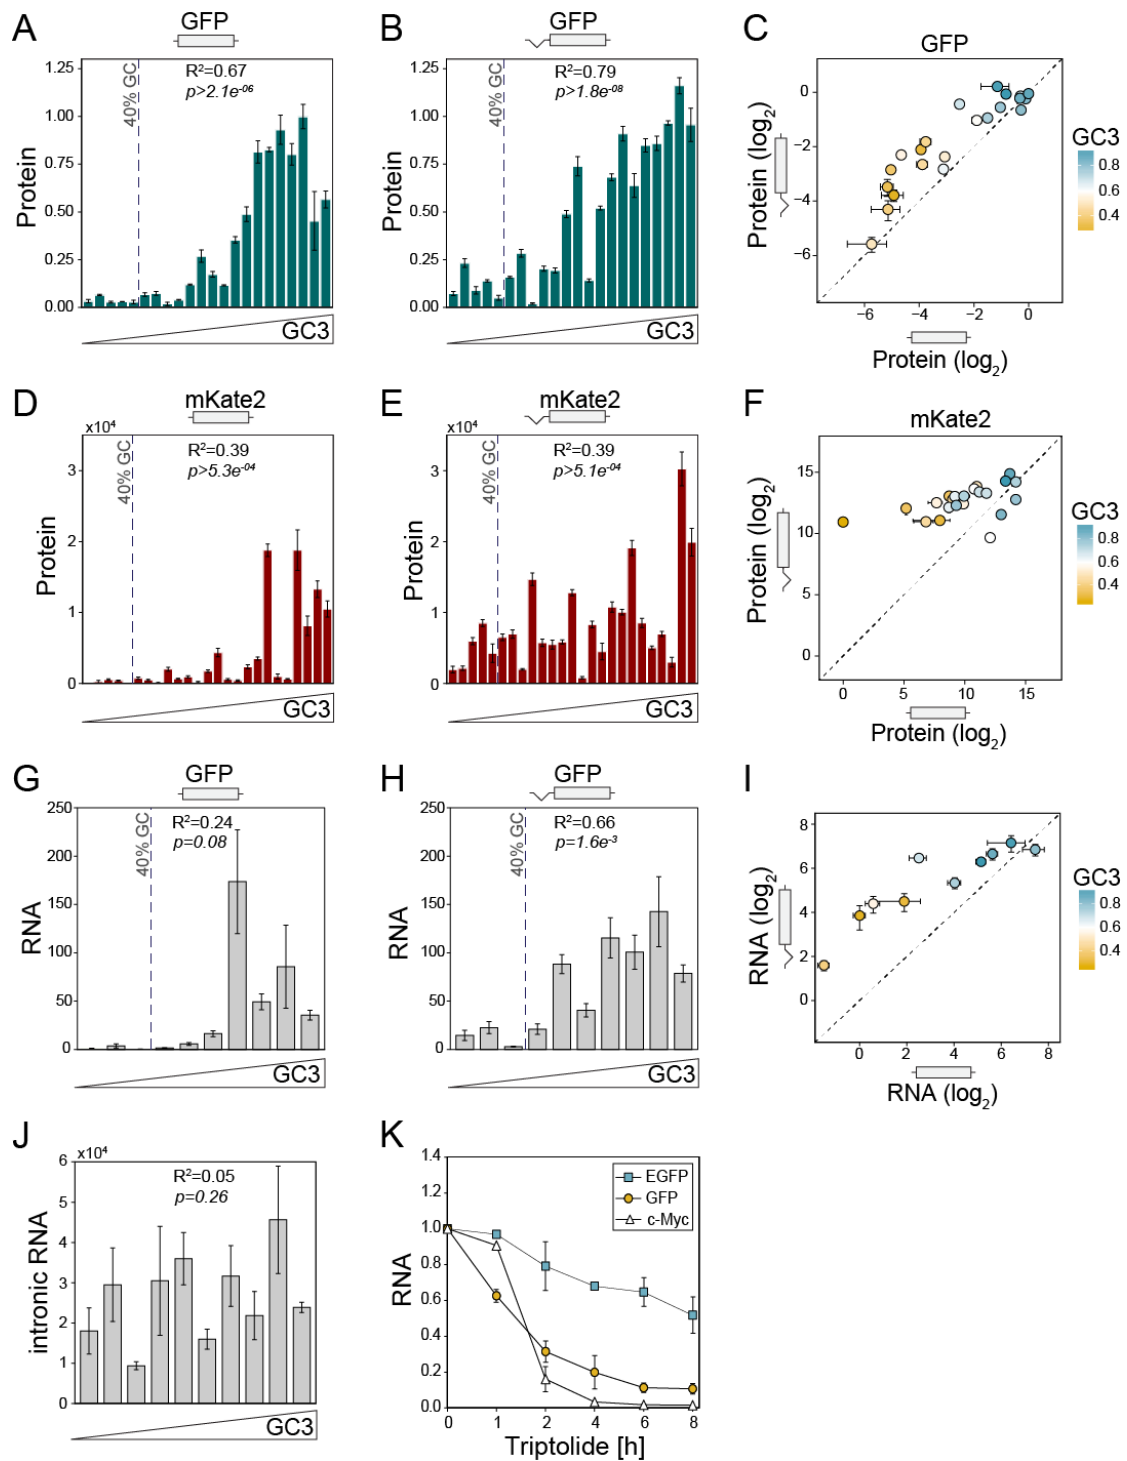

889

890

891 **Figure 2. The effect of GC content on gene expression depends on splicing.**

892 (A-B) Protein levels of 22 GFP variants when transiently expressed as unspliced

893 (A) or spliced (B) constructs were expressed in HeLa cells and quantified by

894 spectrofluorometry. Each data point represents the mean of 9 replicates, +/-

895 SEM.

896 (C) Correlation of protein levels between unspliced and spliced variants of GFP  
897 (n=22,  $R^2=0.69$ ,  $p=9.0\times 10^{-7}$ ). The dashed line indicates  $x=y$ .  
898 (D-E) Protein levels of 23 mKate2 variants in the absence (A) or presence (B) of  
899 splicing. Each data point represents the mean of 9 replicates.  
900 (F) Correlation of protein levels between unspliced and spliced variants of  
901 mKate2 (n=23,  $R^2=0.29$ ,  $p=2.8\times 10^{-4}$ ).  
902 (G-H) mRNA levels of 10 GFP variants when transiently expressed as unspliced  
903 (G) or spliced (H) constructs in HeLa cells and quantified by qRT-PCR. Data  
904 points represent the mean of 3 replicates, +/- SEM.  
905 (I) Comparison of mRNA expression from spliced and unspliced GFP variants.  
906 (J) Intronic RNA levels of GFP variants measured by qRT-PCR.  
907 (K) RNA stability time course of GC-rich (97% GC3;  $t_{1/2}=8.6\text{h}$ ) and GC-poor (33%  
908 GC3,  $t_{1/2}=2.4\text{h}$ ) GFP variants in stably transfected HeLa Flp-In cells after blocking  
909 transcription with 500nM Triptolide. Results represent the averages of 2  
910 independent experiments, +/- SD.  
911



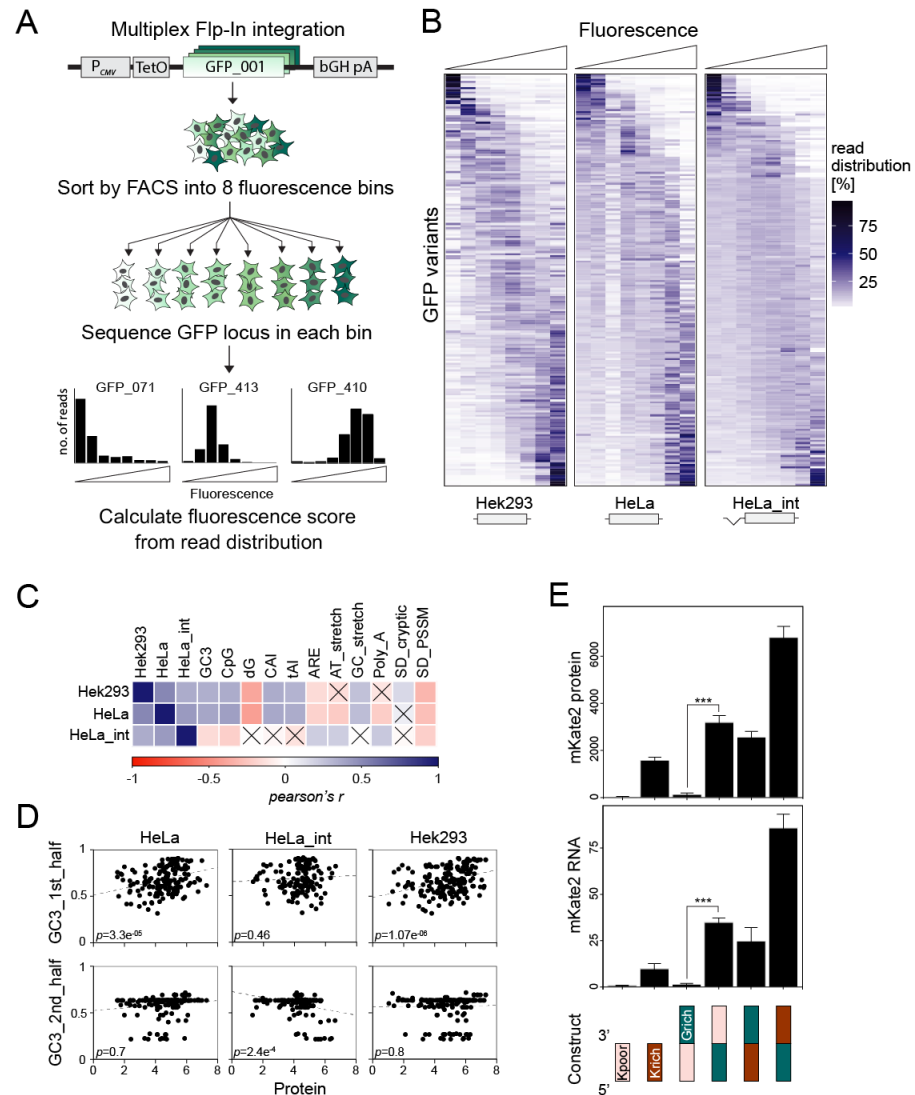

912

913

914 **Figure 3. Splicing- and position-dependent effects of codon usage on**  
 915 **protein production.**

916 (A) Schematic outline of Flow-Seq experimental workflow. Stable HeLa and  
 917 HEK293 cell pools expressing 217 GFP variants were established using a  
 918 multiplex Flp-In integration approach. 24h post-induction, cells are sorted by  
 919 FACS into 8 fluorescence bins, genomic DNA extracted followed by high-  
 920 throughput sequencing of the GFP locus. Individual fluorescence scores for each  
 921 variant are calculated from normalised read distributions. (See Methods and  
 922 Figure S4).

923 (B) Heatmap representation of Flow-Seq results. Rows represent normalised  
 924 read distributions of individual GFP variants across 8 fluorescence bins  
 925 (columns). The average difference between lowest and highest fluorescence bin

926 equals about 100-fold. Data shown represents the average of 3 Flow-Seq  
927 measurements for HeLa cells, the average of 3 Flow-Seq experiments for HeLa  
928 with intron and 1 experiment for HEK293 cells.

929 (C) Pearson's correlation matrix of experimental measurements obtained by  
930 Flow-Seq and sequence covariates. The colour of squares indicates the  
931 correlation coefficient; crosses indicate non-significant correlations.

932 (D) Correlations between Flow-Seq measurements and GC3 content of 1<sup>st</sup> (nt 1-  
933 360) and 2<sup>nd</sup> (nt 361 - 720) halves of GFP sequences.

934 (E) Protein and mRNA measurements of translational fusion constructs between  
935 GC-poor (30% GC3, Kpoor) and GC-rich (85% GC3, Krich) variants of mKate2  
936 with a GC-rich variant of GFP (97% GC3, Grich). Data represents the mean of 3  
937 replicates + SEM (see also Figure S5).

938

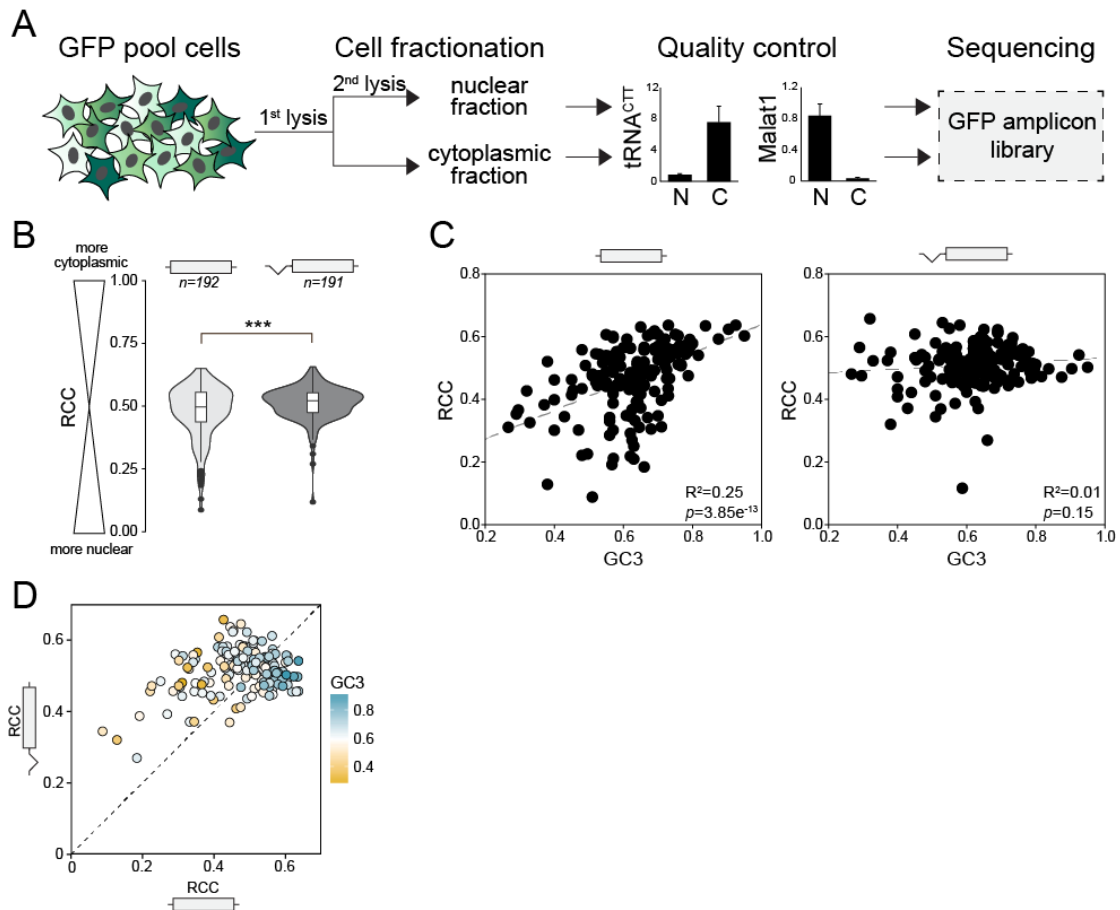

939

940

941 **Figure 4. High GC content increases cytoplasmic localisation of mRNA.**

942 (A) Stable HeLa pools expressing 217 GFP variants +/- intron were fractionated  
 943 into nuclear and cytoplasmic portions before RNA extraction. Specific markers of  
 944 subcellular compartments were quantified by qRT-PCR before amplicon-library  
 945 preparation (see also Methods).

946 (B) Relative cytoplasmic concentration (RCC) of unspliced and spliced GFP  
 947 variants. Data represents the mean of 2 replicates. \*\*\*p=2×10<sup>-6</sup>.

948 (C) Correlation between GC3 content and RCC for unspliced and spliced GFP  
 949 RNA. Data points represent the means of 2 replicates.

950 (D) Correlation between RCC scores of unspliced and spliced GFP (R<sup>2</sup>=0.1,  
 951 p=2.6×10<sup>-5</sup>).

952

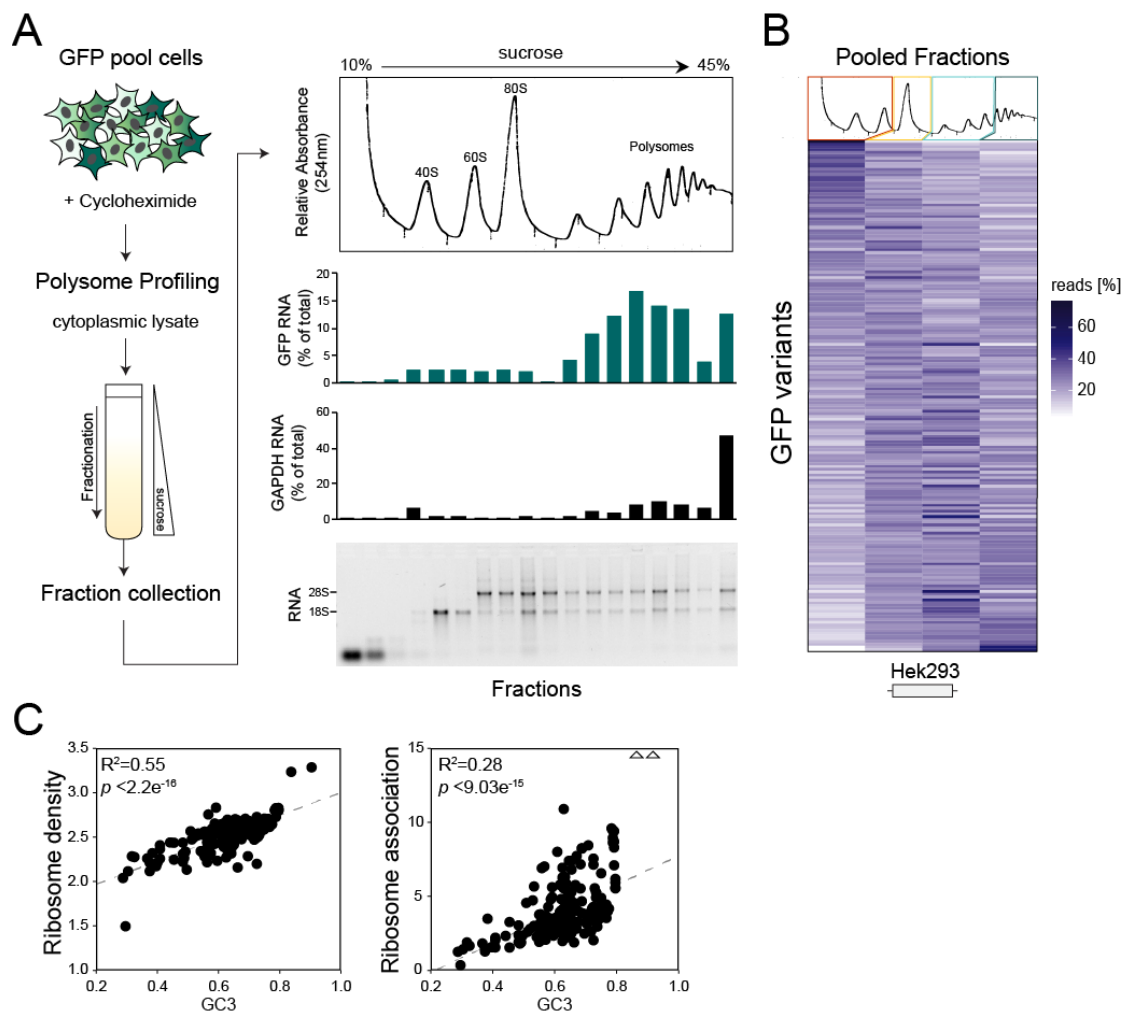

953

954

955 **Figure 5. High GC content leads to increased ribosome association.**

956 (A) (Left) A stable pool of HEK293 cells expressing 217 unspliced GFP variants  
957 was subjected to polysome profiling using sucrose gradient centrifugation.  
958 (Right, from top to bottom) UV absorbance profile, GFP mRNA abundance,  
959 GAPDH mRNA abundance, ethidium bromide staining of gradient fractions. GFP  
960 and GAPDH mRNA were quantified by qRT-PCR.

961 (B) RNA from collected fractions was combined into 4 pools (as indicated by  
962 coloured boxes) before amplicon library preparation for high-throughput  
963 sequencing: unbound ribonucleoprotein complexes (red), monosomes (yellow),  
964 light polysomes (light green) and heavy polysomes (dark green). Resulting read  
965 distributions (in %) for GFP variants are represented as heatmap.

966 (C) Correlation plot between mean ribosome density (left panel) and ribosome  
967 association (right panel) of GFP variants and their corresponding GC3 content.

968

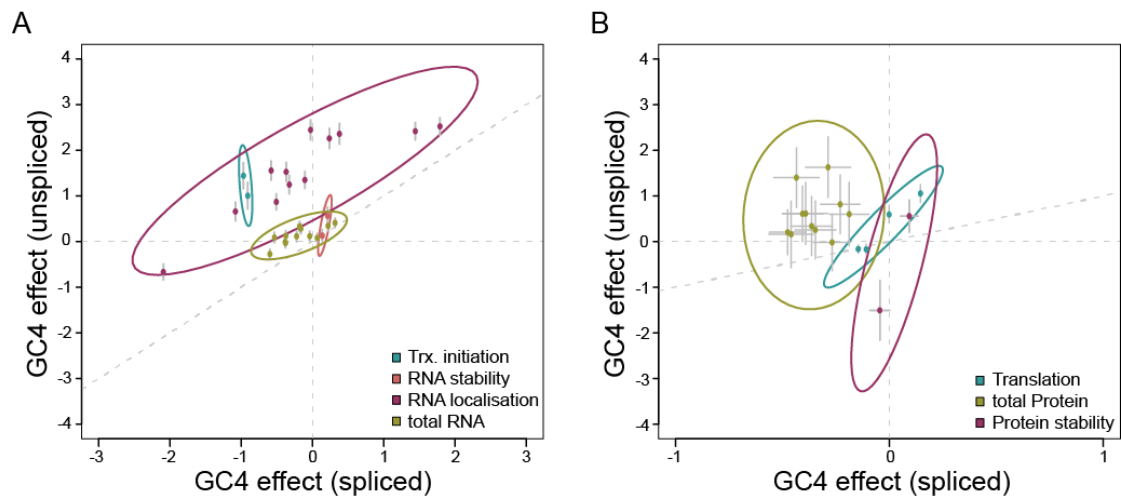

969

970

971 **Figure 6. Splicing-dependent codon usage shapes global gene expression.**

972 Plots showing the effect of GC4 content on the expression of unspliced (x-axis)

973 and spliced (y-axis) endogenous human genes, both on RNA and protein level.

974 Each point corresponds to the regression coefficient of an individual experiment

975 (cell line and/or biological replicate). Error bars indicate the standard error of

976 these regression coefficients. Surrounding ellipses indicate the 95% confidence

977 interval for 1,000 bootstraps of underlying data (see Methods, Figure S6 and

978 Table S1). The diagonal indicates  $x=y$ .

979

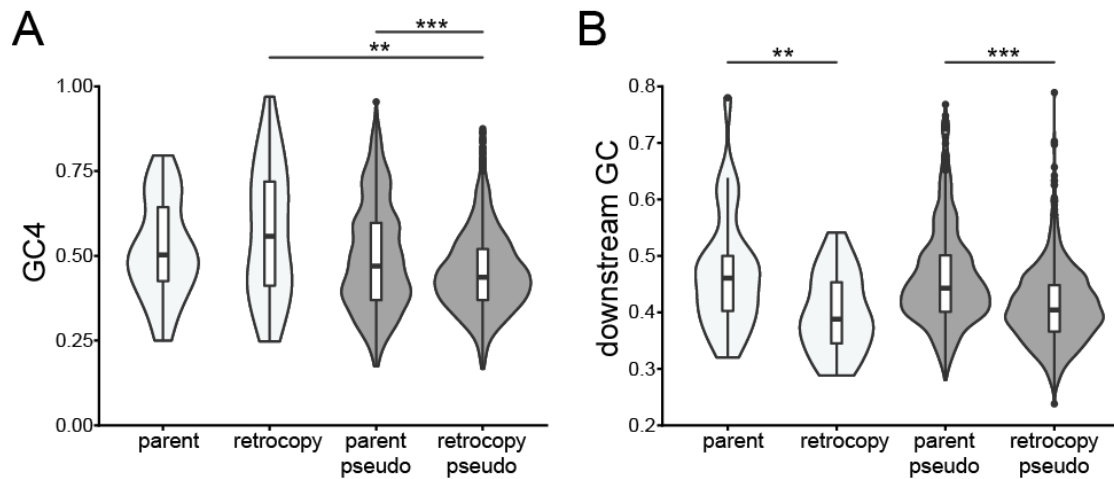

980

981

982 **Supplementary Figure 1. GC4 variation amongst parent-retrogene pairs**  
983 **and their downstream sequence.**

984 (A) GC4 content distribution across parent and retrogene pairs conserved  
985 between human and macaque. White violins indicate pairs for which retrocopies  
986 are classed as functional ( $p=0.26$ ,  $n=31$ , two-tailed Wilcoxon signed-rank test),  
987 whereas grey violins correspond to pairs in which the retrocopy is classed as  
988 non-functional pseudogene ( $p < 2.2 \times 10^{-16}$ ,  $n=1562$ , two-tailed Wilcoxon signed-  
989 rank test). Note that a different retrogene dataset was used than in the main text  
990 (see Methods for details). For the human-macaque set, the difference in GC4  
991 between parents and functional copies is in the expected direction but not  
992 significant.

993 (B) Violin plot showing GC content within a window between 2000 and 3000nt  
994 downstream from the stop codons of functional (white,  $p=9.27 \times 10^{-4}$ ,  $n=31$ , two-  
995 tailed Wilcoxon signed-rank test) and non-functional (grey,  $p < 2.2 \times 10^{-16}$ ,  $n=1562$ ,  
996 two-tailed Wilcoxon signed-rank test) parent-retrogene pairs conserved  
997 between human and macaque.

998

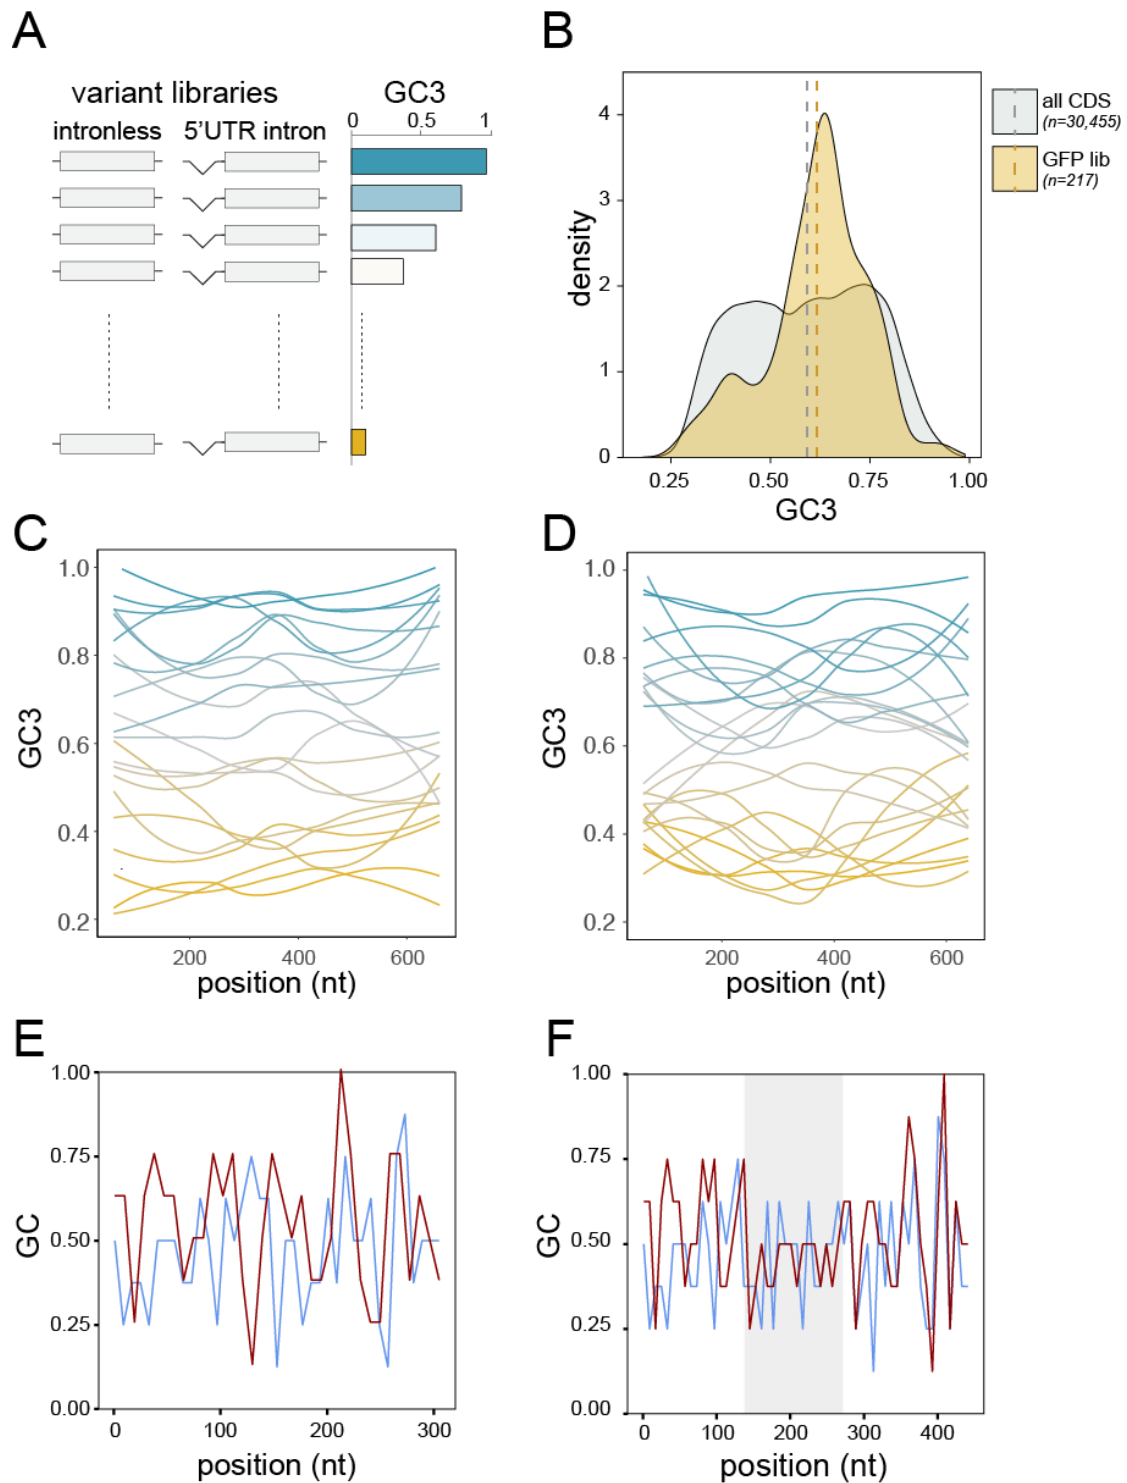

999

1000

1001 **Supplementary Figure 2. GC content variation amongst endogenous genes**  
1002 **and reporter libraries.**

1003 (A) Libraries of reporter genes with random synonymous codon usage were  
1004 designed to cover a broad range of GC3 content variation. Variants were  
1005 expressed with and without a synthetic 5'UTR intron.

1006 (B) GC3 content distribution amongst human consensus coding sequences (CDS;  
1007 grey) in comparison to the GFP variant library used in this study (GFP lib;  
1008 orange). Dashed lines indicate the mean GC3 for each data set.  
1009 (C-D) Loess-smoothed GC3 profiles along the 22 GFP variants (C) and 23 mKate  
1010 variants (D) that were analysed by spectrofluorometry (Figure 2).  
1011 (E) Sliding window analysis of GC content in 5'UTRs of intronless expression  
1012 cassettes utilised in this study. Blue: pCM3 (transient transfection, no intron);  
1013 red: pcDNA5/FRT/TO/DEST (stable transfection, no intron).  
1014 (F) As above, intron-containing expression cassettes. Blue: pCM4 (transient  
1015 transfection, with intron); red: pcDNA5/FRT/TO/DEST/INT (stable transfection,  
1016 with intron). Grey shading indicates the position of the synthetic intron.  
1017



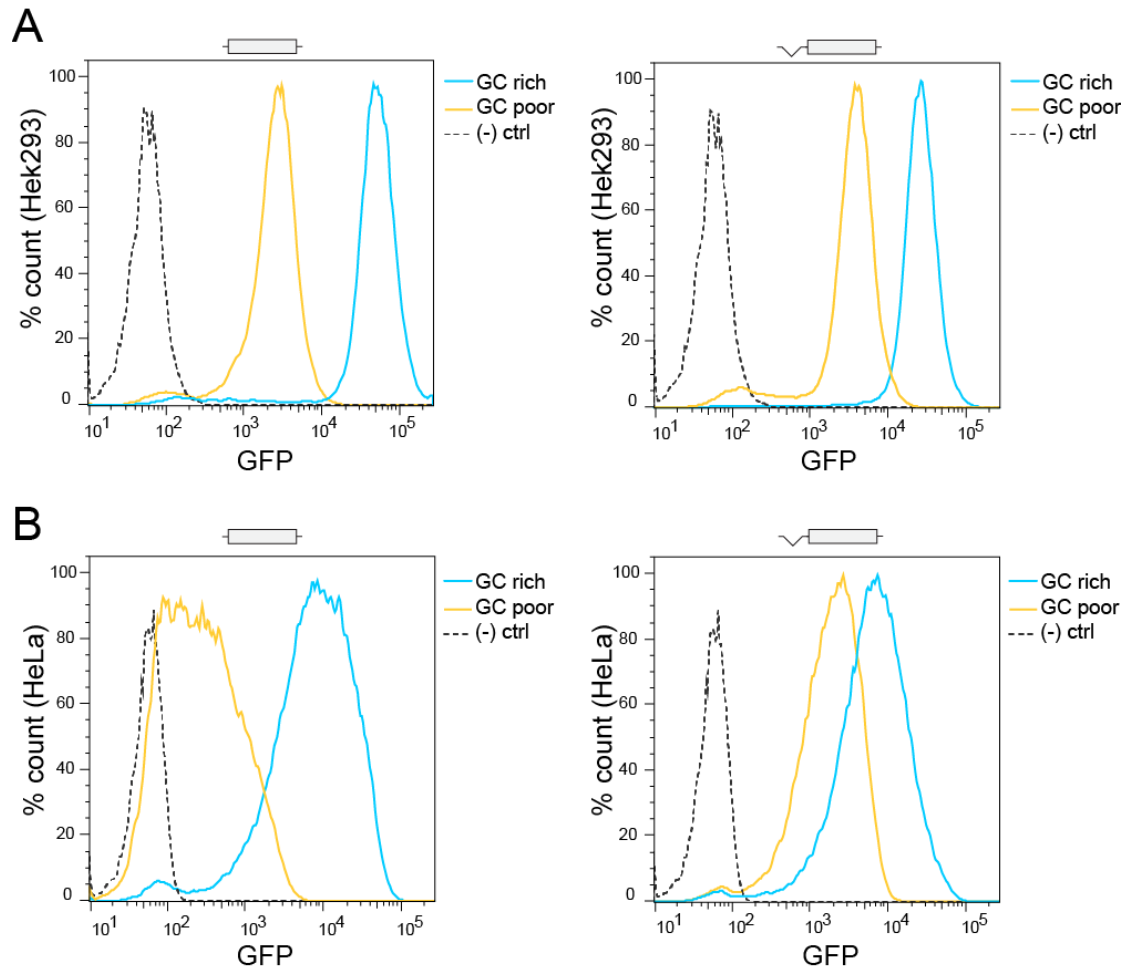

1018

1019

1020 **Supplementary Figure 3. Effect of GC content on expression of fluorescent**  
1021 **reporter genes in stably transfected cell lines.**

1022 Flow cytometry measurements of two GFP variants in stably transfected HEK293

1023 Flp-in (A) and HeLa Flp-in (B). GC poor = 33% GC3; GC rich = 97% GC3; (-)ctrl =

1024 untransfected cells. Data shows representative results of at least 3 experiments.

1025

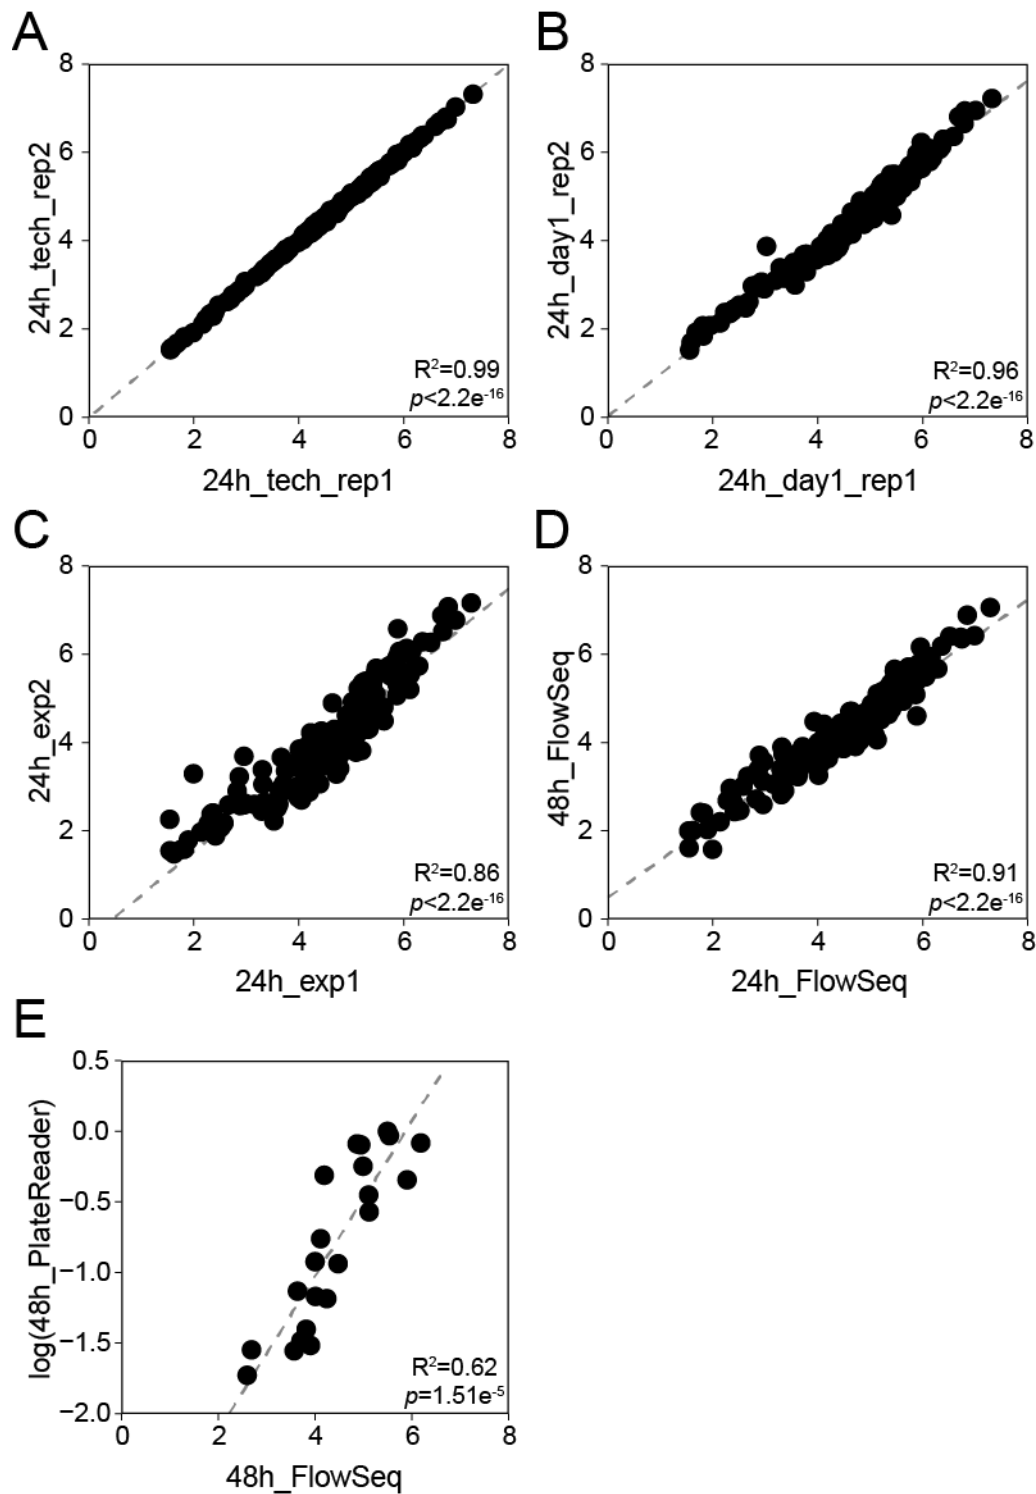

1026

1027

1028 **Supplementary Figure 4. Reproducibility of Flow-seq experiments in HeLa**  
1029 **cells (unspliced GFP variants).**

1030 (A) Re-sequencing of the same amplicon-library.

1031 (B-C) Replicate Flow-seq experiments performed on the same day (B) or

1032 different days (C).

1033 (D) Flow-Seq experiments performed on the same pool of cells, 24h and 48h  
1034 after the induction of GFP expression.  
1035 (E) Correlation between fluorescence measurements of 22 GFP variants obtained  
1036 spectrofluorometry of transiently transfected HeLa cells and by Flow-Seq of  
1037 HeLa GFP pool cell line.  
1038

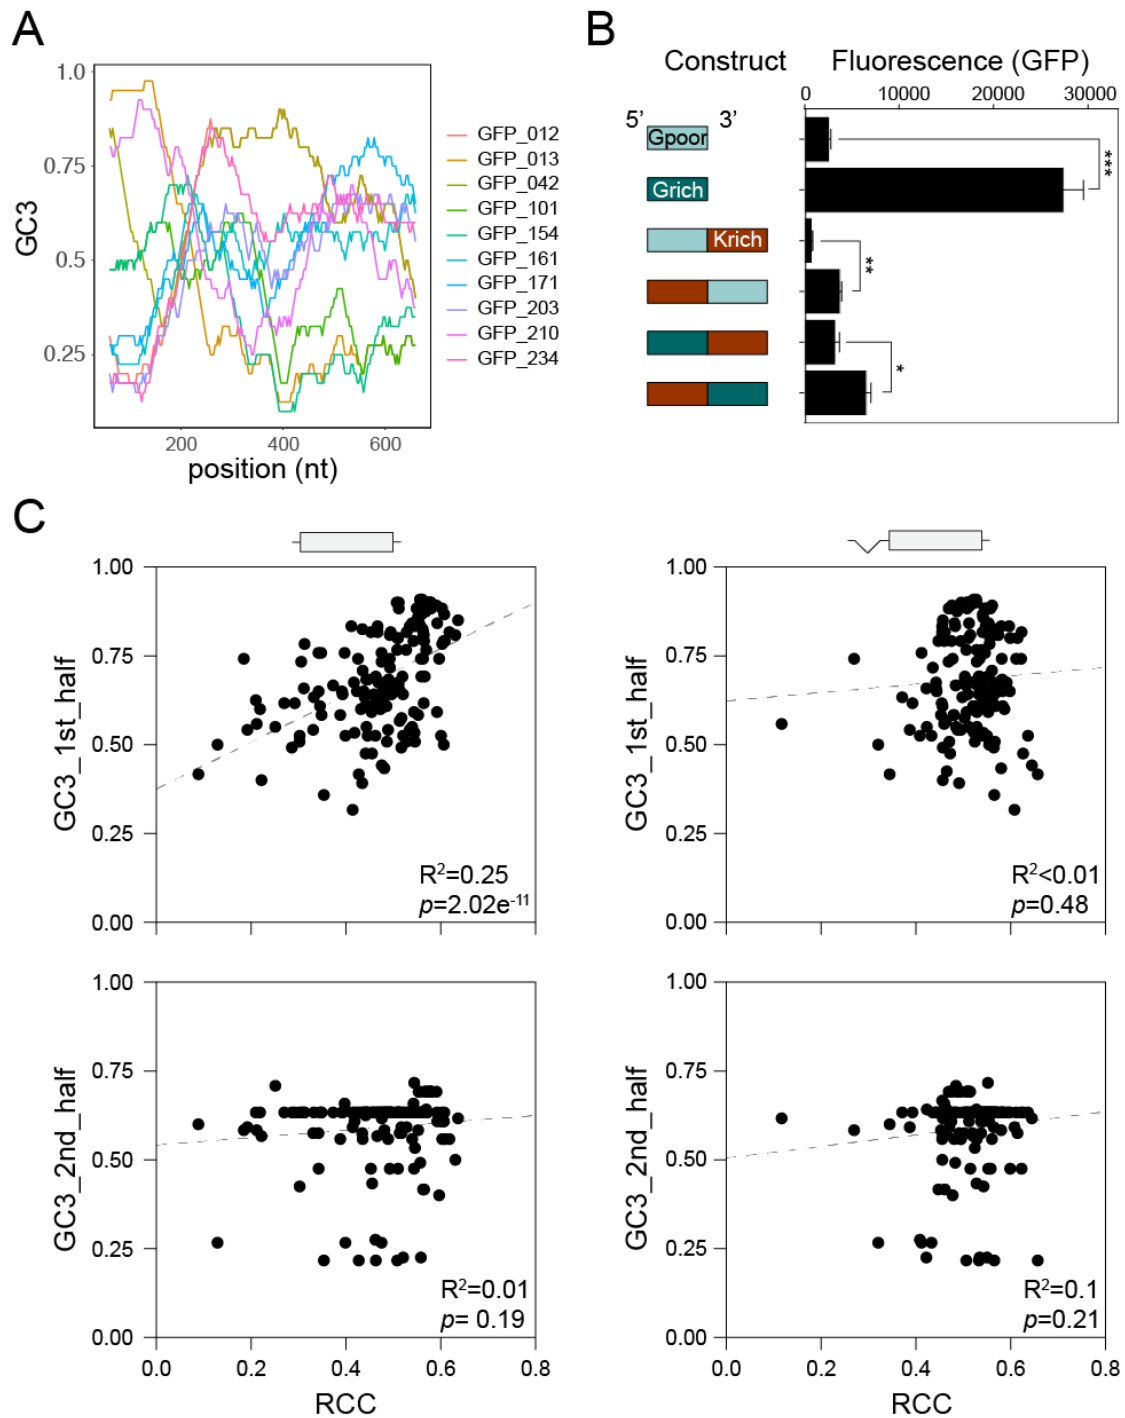

1039

1040

1041 **Supplementary Figure 5. Position-specific effects of GC content on**  
1042 **expression.**

1043 (A) Sliding window analysis of GC3 content in selected GFP variants used in the  
1044 pooled amplicon sequencing experiments.

1045 (B) Protein measurements of translational fusion constructs between GC-poor  
1046 (33% GC3, Gpoor) and GC-rich (97% GC3, Grich) variants of GFP with a GC-rich

1047 variant of mKate2 (85% GC3, Krich), upon transient transfection into HeLa cells.  
1048 Data represent the mean of 3 replicates + SEM.  
1049 (C) Correlations between the GC3 content in the 1st (nt 1-360) and 2nd (nt 361-  
1050 720) halves of GFP variants and their relative cytoplasmic mRNA concentrations.  
1051

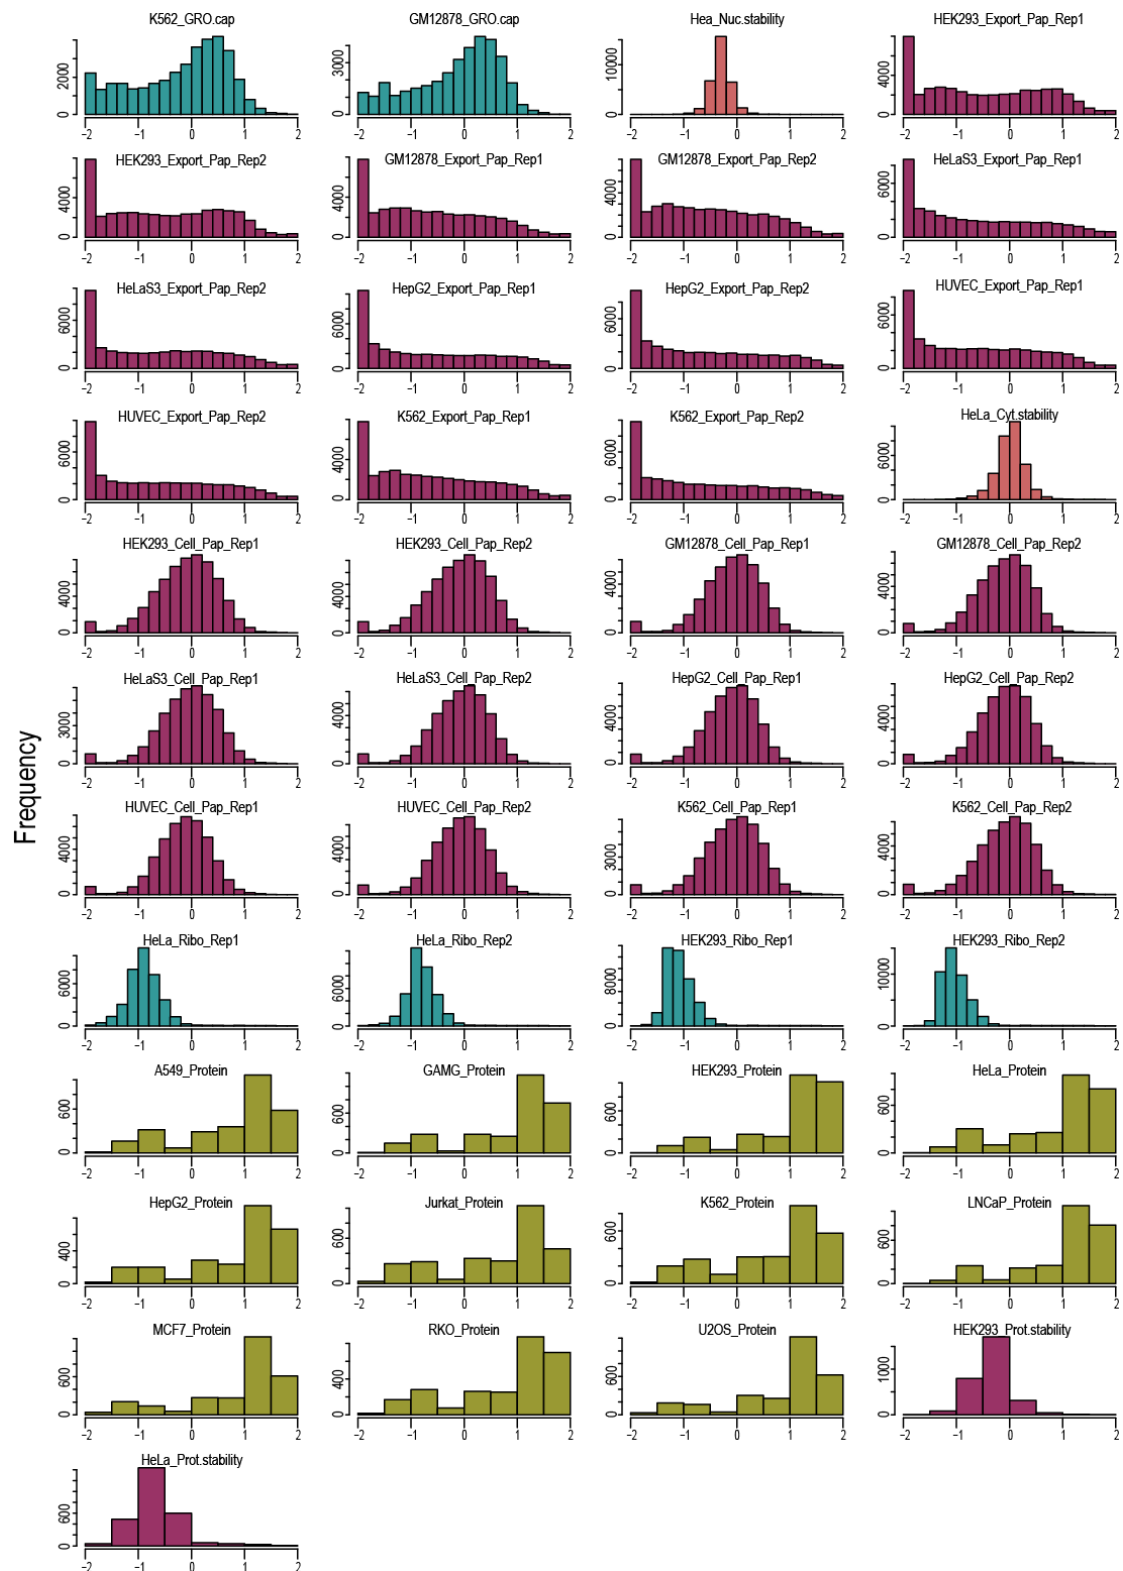

1052

1053

1054 **Supplementary Figure 6. Distribution of RNA and protein expression data**  
1055 **used in regression modelling.**

1056 Human RNA and protein expression data were extracted from various databases,

1057 filtered and normalized as described in Supplementary Table 1 and in the

1058    Methods section. The histograms show the distributions of preprocessed  
1059    expression measurements.  
1060

1061 **Supplementary Table 1. Sources of human gene expression data.**

1062 The cellular process to be quantified is indicated above the table, and the  
 1063 experimental techniques and data sources are indicated below. Each dot  
 1064 indicates an experimental replicate measurement.

1065

|                    | Transcription | nuclear stability                | cytoplasmic stability             | RNA levels                                      | RNA export                                      | Translation | Protein levels         | Protein stability                 |
|--------------------|---------------|----------------------------------|-----------------------------------|-------------------------------------------------|-------------------------------------------------|-------------|------------------------|-----------------------------------|
| K562               | ●             |                                  |                                   | ●●                                              | ●●                                              |             | ●                      |                                   |
| Gm12878            | ●             |                                  |                                   | ●●                                              | ●●                                              |             |                        |                                   |
| HeLa               |               | ●                                | ●                                 | ●●                                              | ●●                                              | ●●          | ●                      | ●                                 |
| Hek293             |               |                                  |                                   | ●●                                              | ●●                                              | ●●          | ●                      | ●                                 |
| Huvec              |               |                                  |                                   | ●●                                              | ●●                                              |             |                        |                                   |
| HepG2              |               |                                  |                                   | ●●                                              | ●●                                              |             | ●                      |                                   |
| A549               |               |                                  |                                   |                                                 |                                                 |             | ●                      |                                   |
| GAMG               |               |                                  |                                   |                                                 |                                                 |             | ●                      |                                   |
| Jurkat             |               |                                  |                                   |                                                 |                                                 |             | ●                      |                                   |
| LnCap              |               |                                  |                                   |                                                 |                                                 |             | ●                      |                                   |
| MCF7               |               |                                  |                                   |                                                 |                                                 |             | ●                      |                                   |
| RKO                |               |                                  |                                   |                                                 |                                                 |             | ●                      |                                   |
| U2OS               |               |                                  |                                   |                                                 |                                                 |             | ●                      |                                   |
| <b>data type</b>   | GRO-cap       | CAGE-seq:<br>Mtr4 KD/<br>EGFP KD | CAGE-seq:<br>Rrp40 KD/<br>Mtr4 KD | RNA-seq                                         | RNA-seq                                         | Ribo-seq    | Mass-spec              | Mass-<br>spec/Ribo-<br>seq        |
| <b>data source</b> | ENCODE        | Andersson<br>et al., 2014        | Andersson<br>et al., 2014         | Hek293:<br>this study;<br>all others:<br>ENCODE | Hek293:<br>this study;<br>all others:<br>ENCODE | ENCODE      | Geiger et<br>al., 2012 | Geiger et<br>al., 2012;<br>ENCODE |

1066

1067



1068 **Supplementary Table 2. List of primers used.**

1069

| MiSeq library + sequencing | 5' → 3'                                                                               |
|----------------------------|---------------------------------------------------------------------------------------|
| PE_PCR_left                | AATGATACGGCGACCACCGAGATCTACACGCTGGCACGCGTAAGAAGGAGATATAACCATG                         |
| S_index1_right_P EPCR      | CAAGCAGAAGACGGCATAACGAGATCGTGTGACTGGAGTTCAGACGTGTGCTCTTCCGATCTATGTGCAGGGCCGCGAATTC    |
| S_index2_right_P EPCR      | CAAGCAGAAGACGGCATAACGAGATACATCGGTGACTGGAGTTCAGACGTGTGCTCTTCCGATCTATGTGCAGGGCCGCGAATTC |
| S_index3_right_P EPCR      | CAAGCAGAAGACGGCATAACGAGATGCCTAAGTACTGGAGTTCAGACGTGTGCTCTTCCGATCTATGTGCAGGGCCGCGAATTC  |
| S_index4_right_P EPCR      | CAAGCAGAAGACGGCATAACGAGATTGGTCAGTACTGGAGTTCAGACGTGTGCTCTTCCGATCTATGTGCAGGGCCGCGAATTC  |
| S_index5_right_P EPCR      | CAAGCAGAAGACGGCATAACGAGATCACTGTGTGACTGGAGTTCAGACGTGTGCTCTTCCGATCTATGTGCAGGGCCGCGAATTC |
| S_index6_right_P EPCR      | CAAGCAGAAGACGGCATAACGAGATATTGGCGTACTGGAGTTCAGACGTGTGCTCTTCCGATCTATGTGCAGGGCCGCGAATTC  |
| S_index7_right_P EPCR      | CAAGCAGAAGACGGCATAACGAGATGATCTGGTACTGGAGTTCAGACGTGTGCTCTTCCGATCTATGTGCAGGGCCGCGAATTC  |
| S_index8_right_P EPCR      | CAAGCAGAAGACGGCATAACGAGATTCAAGTGTGACTGGAGTTCAGACGTGTGCTCTTCCGATCTATGTGCAGGGCCGCGAATTC |
| Read1_seq_primer_GFP       | GCTGGCACGCGTAAGAAGGAGATATAACCATG                                                      |
| <b>cloning primers</b>     |                                                                                       |
| pCl_del_int_F (phospho)    | GTGTCCACTCCCAGTTCAAT                                                                  |
| pCl_del_int_R (phospho)    | CTGCCCAGTGCCTCACGACC                                                                  |
| mkate2_gibs_F              | GATCCGCGTATGGTGGCCTTAAGATACATTGATGAG                                                  |
| mkate2_gibs_R              | TGTAAGCGGATGCCGCACATGTTCTTTCCTGCG                                                     |
| pCl_gib_F                  | CGGCATCCGCTTACAGACAA                                                                  |
| pCl_gib_R                  | CACCATACGGGATCCTTATC                                                                  |
| <b>qPCR primers</b>        |                                                                                       |
| pcDNA5-UTR_F               | GTTGCCAGCCATCTGTTGTT                                                                  |
| pcDNA5-UTR_R               | CTCAGACAATGCGATGCAATTTCC                                                              |
| pCl-UTR_F                  | CTTCCCTTTAGTGAGGGTTAATG                                                               |
| pCl-UTR_R                  | GTTTATTGCAGCTTATAATGGTTAC                                                             |
| pCl-mRNA_F                 | GCTAACGCAGTCAGTGCTTC                                                                  |
| pCl-mRNA_R                 | ACACCCAGTGCCTCACGAC                                                                   |
| pCl-premRNA_F              | GAGGCACTGGGCAGGTAAGTATC                                                               |
| pCl-premRNA_R              | GTGGATGTCAGTAAGACCAATAGGTG                                                            |
| Gapdh_F                    | GGAGTCAACGGATTTGG                                                                     |
| Gapdh_R                    | GTAGTTGAGGTCAATGAAGGG                                                                 |
| Neo_F                      | CCCGTGATATTGCTGAAGAG                                                                  |
| Neo_R                      | CGTCAAGAAGGCGATAGAAG                                                                  |
| LysCTT_F                   | TCAGTCGGTAGAGCATGAGAC                                                                 |
| LysCTT_R                   | CAACGTGGGGCTCGAACC                                                                    |
| Malat1_F                   | CAGACCCTTACCCCTCAC                                                                    |
| Malat1_R                   | TTATGGATCATGCCACAAG                                                                   |

1070

1071

## Reference list

- Andersson, R., Refsing Andersen, P., Valen, E., Core, L.J., Bornholdt, J., Boyd, M., Heick Jensen, T., and Sandelin, A. (2014). Nuclear stability and transcriptional directionality separate functionally distinct RNA species. *Nature communications* 5, 5336.
- Arango, D., Sturgill, D., Alhusaini, N., Dillman, A.A., Sweet, T.J., Hanson, G., Hosogane, M., Sinclair, W.R., Nanan, K.K., Mandler, M.D., *et al.* (2018). Acetylation of Cytidine in mRNA Promotes Translation Efficiency. *Cell* 175, 1872-1886 e1824.
- Arhondakis, S., Auletta, F., and Bernardi, G. (2011). Isochores and the regulation of gene expression in the human genome. *Genome Biol Evol* 3, 1080-1089.
- Bauer, A.P., Leikam, D., Krinner, S., Notka, F., Ludwig, C., Langst, G., and Wagner, R. (2010). The impact of intragenic CpG content on gene expression. *Nucleic Acids Res* 38, 3891-3908.
- Bazzini, A.A., Del Viso, F., Moreno-Mateos, M.A., Johnstone, T.G., Vejnar, C.E., Qin, Y., Yao, J., Khokha, M.K., and Giraldez, A.J. (2016). Codon identity regulates mRNA stability and translation efficiency during the maternal-to-zygotic transition. *EMBO J* 35, 2087-2103.
- Bentele, K., Saffert, P., Rauscher, R., Ignatova, Z., and Bluthgen, N. (2013). Efficient translation initiation dictates codon usage at gene start. *Mol Syst Biol* 9, 675.
- Bernardi, G. (1993). The vertebrate genome: isochores and evolution. *Mol Biol Evol* 10, 186-204.
- Burow, D.A., Martin, S., Quail, J.F., Alhusaini, N., Coller, J., and Cleary, M.D. (2018). Attenuated Codon Optimality Contributes to Neural-Specific mRNA Decay in *Drosophila*. *Cell reports* 24, 1704-1712.
- Carels, N., and Bernardi, G. (2000). Two classes of genes in plants. *Genetics* 154, 1819-1825.
- Dittmar, K.A., Goodenbour, J.M., and Pan, T. (2006). Tissue-specific differences in human transfer RNA expression. *PLoS Genet* 2, e221.
- Dominissini, D., Moshitch-Moshkovitz, S., Schwartz, S., Salmon-Divon, M., Ungar, L., Osenberg, S., Cesarkas, K., Jacob-Hirsch, J., Amariglio, N., Kupiec, M., *et al.* (2012). Topology of the human and mouse m6A RNA methylomes revealed by m6A-seq. *Nature* 485, 201-206.
- dos Reis, M., Savva, R., and Wernisch, L. (2004). Solving the riddle of codon usage preferences: a test for translational selection. *Nucleic Acids Res* 32, 5036-5044.
- Duan, J., Shi, J., Ge, X., Dolken, L., Moy, W., He, D., Shi, S., Sanders, A.R., Ross, J., and Gejman, P.V. (2013). Genome-wide survey of interindividual differences of RNA stability in human lymphoblastoid cell lines. *Scientific reports* 3, 1318.
- Duret, L., and Galtier, N. (2009). Biased gene conversion and the evolution of mammalian genomic landscapes. *Annu Rev Genomics Hum Genet* 10, 285-311.

- Eyre-Walker, A.C. (1991). An analysis of codon usage in mammals: selection or mutation bias? *J Mol Evol* *33*, 442-449.
- Fath, S., Bauer, A.P., Liss, M., Spriestersbach, A., Maertens, B., Hahn, P., Ludwig, C., Schafer, F., Graf, M., and Wagner, R. (2011). Multiparameter RNA and codon optimization: a standardized tool to assess and enhance autologous mammalian gene expression. *PLoS One* *6*, e17596.
- Gagnon, K.T., Li, L., Janowski, B.A., and Corey, D.R. (2014). Analysis of nuclear RNA interference in human cells by subcellular fractionation and Argonaute loading. *Nat Protoc* *9*, 2045-2060.
- Galtier, N., Roux, C., Rousselle, M., Romiguier, J., Figuet, E., Glemin, S., Bierne, N., and Duret, L. (2018). Codon Usage Bias in Animals: Disentangling the Effects of Natural Selection, Effective Population Size, and GC-Biased Gene Conversion. *Mol Biol Evol* *35*, 1092-1103.
- Geiger, T., Wehner, A., Schaab, C., Cox, J., and Mann, M. (2012). Comparative proteomic analysis of eleven common cell lines reveals ubiquitous but varying expression of most proteins. *Mol Cell Proteomics* *11*, M111 014050.
- Gingold, H., Tehler, D., Christoffersen, N.R., Nielsen, M.M., Asmar, F., Kooistra, S.M., Christophersen, N.S., Christensen, L.L., Borre, M., Sorensen, K.D., *et al.* (2014). A dual program for translation regulation in cellular proliferation and differentiation. *Cell* *158*, 1281-1292.
- Goodman, D.B., Church, G.M., and Kosuri, S. (2013). Causes and effects of N-terminal codon bias in bacterial genes. *Science* *342*, 475-479.
- Gu, W., Zhou, T., and Wilke, C.O. (2010). A universal trend of reduced mRNA stability near the translation-initiation site in prokaryotes and eukaryotes. *PLoS Comput Biol* *6*, e1000664.
- Higgs, D.R., Goodbourn, S.E., Lamb, J., Clegg, J.B., Weatherall, D.J., and Proudfoot, N.J. (1983). Alpha-thalassaemia caused by a polyadenylation signal mutation. *Nature* *306*, 398-400.
- Kosovac, D., Wild, J., Ludwig, C., Meissner, S., Bauer, A.P., and Wagner, R. (2011). Minimal doses of a sequence-optimized transgene mediate high-level and long-term EPO expression in vivo: challenging CpG-free gene design. *Gene Ther* *18*, 189-198.
- Kosuri, S., Goodman, D.B., Cambray, G., Mutalik, V.K., Gao, Y., Arkin, A.P., Endy, D., and Church, G.M. (2013). Composability of regulatory sequences controlling transcription and translation in *Escherichia coli*. *Proc Natl Acad Sci U S A* *110*, 14024-14029.
- Kotsopoulou, E., Kim, V.N., Kingsman, A.J., Kingsman, S.M., and Mitrophanous, K.A. (2000). A Rev-independent human immunodeficiency virus type 1 (HIV-1)-based vector that exploits a codon-optimized HIV-1 gag-pol gene. *J Virol* *74*, 4839-4852.
- Kudla, G., Lipinski, L., Caffin, F., Helwak, A., and Zylicz, M. (2006). High guanine and cytosine content increases mRNA levels in mammalian cells. *PLoS Biol* *4*, e180.

- Kudla, G., Murray, A.W., Tollervey, D., and Plotkin, J.B. (2009). Coding-sequence determinants of gene expression in *Escherichia coli*. *Science* *324*, 255-258.
- Kwek, K.Y., Murphy, S., Furger, A., Thomas, B., O'Gorman, W., Kimura, H., Proudfoot, N.J., and Akoulitchev, A. (2002). U1 snRNA associates with TFIID and regulates transcriptional initiation. *Nat Struct Biol* *9*, 800-805.
- Lander, E.S., Linton, L.M., Birren, B., Nusbaum, C., Zody, M.C., Baldwin, J., Devon, K., Dewar, K., Doyle, M., FitzHugh, W., *et al.* (2001). Initial sequencing and analysis of the human genome. *Nature* *409*, 860-921.
- Lercher, M.J., Urrutia, A.O., Pavlicek, A., and Hurst, L.D. (2003). A unification of mosaic structures in the human genome. *Hum Mol Genet* *12*, 2411-2415.
- Li, W. (2011). On parameters of the human genome. *J Theor Biol* *288*, 92-104.
- Livak, K.J., and Schmittgen, T.D. (2001). Analysis of relative gene expression data using real-time quantitative PCR and the 2(-Delta Delta C(T)) Method. *Methods* *25*, 402-408.
- Lubelsky, Y., and Ulitsky, I. (2018). Sequences enriched in Alu repeats drive nuclear localization of long RNAs in human cells. *Nature* *555*, 107-111.
- Mishima, Y., and Tomari, Y. (2016). Codon Usage and 3' UTR Length Determine Maternal mRNA Stability in Zebrafish. *Mol Cell* *61*, 874-885.
- Mittal, P., Brindle, J., Stephen, J., Plotkin, J.B., and Kudla, G. (2018). Codon usage influences fitness through RNA toxicity. *Proc Natl Acad Sci U S A* *115*, 8639-8644.
- Muller-McNicoll, M., Botti, V., de Jesus Domingues, A.M., Brandl, H., Schwich, O.D., Steiner, M.C., Curk, T., Poser, I., Zarnack, K., and Neugebauer, K.M. (2016). SR proteins are NXF1 adaptors that link alternative RNA processing to mRNA export. *Genes Dev* *30*, 553-566.
- Nott, A., Le Hir, H., and Moore, M.J. (2004). Splicing enhances translation in mammalian cells: an additional function of the exon junction complex. *Genes Dev* *18*, 210-222.
- Nott, A., Meislin, S.H., and Moore, M.J. (2003). A quantitative analysis of intron effects on mammalian gene expression. *RNA* *9*, 607-617.
- Palazzo, A.F., and Akef, A. (2012). Nuclear export as a key arbiter of "mRNA identity" in eukaryotes. *Biochim Biophys Acta* *1819*, 566-577.
- Palazzo, A.F., Springer, M., Shibata, Y., Lee, C.S., Dias, A.P., and Rapoport, T.A. (2007). The signal sequence coding region promotes nuclear export of mRNA. *PLoS Biol* *5*, e322.
- Parmley, J.L., Urrutia, A.O., Potrzebowski, L., Kaessmann, H., and Hurst, L.D. (2007). Splicing and the evolution of proteins in mammals. *PLoS biology* *5*, e14.
- Plotkin, J.B., and Kudla, G. (2011). Synonymous but not the same: the causes and consequences of codon bias. *Nat Rev Genet* *12*, 32-42.
- Plotkin, J.B., Robins, H., and Levine, A.J. (2004). Tissue-specific codon usage and the expression of human genes. *Proc Natl Acad Sci U S A* *101*, 12588-12591.

Presnyak, V., Alhusaini, N., Chen, Y.H., Martin, S., Morris, N., Kline, N., Olson, S., Weinberg, D., Baker, K.E., Graveley, B.R., *et al.* (2015). Codon optimality is a major determinant of mRNA stability. *Cell* *160*, 1111-1124.

R Development Core Team (2005). R: A language and environment for statistical computing (Vienna, Austria: R Foundation for Statistical Computing).

Radhakrishnan, A., Chen, Y.H., Martin, S., Alhusaini, N., Green, R., and Collier, J. (2016). The DEAD-Box Protein Dhh1p Couples mRNA Decay and Translation by Monitoring Codon Optimality. *Cell* *167*, 122-132 e129.

Ressayre, A., Glemin, S., Montalent, P., Serre-Giardi, L., Dillmann, C., and Joets, J. (2015). Introns Structure Patterns of Variation in Nucleotide Composition in *Arabidopsis thaliana* and Rice Protein-Coding Genes. *Genome Biol Evol* *7*, 2913-2928.

Rosikiewicz, W., Kabza, M., Kosinski, J.G., Ciomborowska-Basheer, J., Kubiak, M.R., and Makalowska, I. (2017). RetrogeneDB-a database of plant and animal retrocopies. *Database (Oxford)* *2017*.

Rudolph, K.L., Schmitt, B.M., Villar, D., White, R.J., Marioni, J.C., Kutter, C., and Odom, D.T. (2016). Codon-Driven Translational Efficiency Is Stable across Diverse Mammalian Cell States. *PLoS Genet* *12*, e1006024.

Savisaar, R., and Hurst, L.D. (2016). Purifying Selection on Exonic Splice Enhancers in Intronless Genes. *Mol Biol Evol* *33*, 1396-1418.

Semon, M., Mouchiroud, D., and Duret, L. (2005). Relationship between gene expression and GC-content in mammals: statistical significance and biological relevance. *Hum Mol Genet* *14*, 421-427.

Shah, P., Ding, Y., Niemczyk, M., Kudla, G., and Plotkin, J.B. (2013). Rate-limiting steps in yeast protein translation. *Cell* *153*, 1589-1601.

Sharp, P.M., and Li, W.H. (1987a). The codon Adaptation Index--a measure of directional synonymous codon usage bias, and its potential applications. *Nucleic Acids Res* *15*, 1281-1295.

Sharp, P.M., and Li, W.H. (1987b). The rate of synonymous substitution in enterobacterial genes is inversely related to codon usage bias. *Mol Biol Evol* *4*, 222-230.

Takata, M.A., Goncalves-Carneiro, D., Zang, T.M., Soll, S.J., York, A., Blanco-Melo, D., and Bieniasz, P.D. (2017). CG dinucleotide suppression enables antiviral defence targeting non-self RNA. *Nature* *550*, 124-127.

Tuller, T., Carmi, A., Vestsigian, K., Navon, S., Dorfan, Y., Zaborske, J., Pan, T., Dahan, O., Furman, I., and Pilpel, Y. (2010). An evolutionarily conserved mechanism for controlling the efficiency of protein translation. *Cell* *141*, 344-354.

Vinogradov, A.E. (2003). Isochores and tissue-specificity. *Nucleic Acids Res* *31*, 5212-5220.

Wang, Y., Zhu, W., and Levy, D.E. (2006). Nuclear and cytoplasmic mRNA quantification by SYBR green based real-time RT-PCR. *Methods* *39*, 356-362.

Webster, M.W., Chen, Y.H., Stowell, J.A.W., Alhusaini, N., Sweet, T., Graveley, B.R., Collier, J., and Passmore, L.A. (2018). mRNA Deadenylation Is Coupled to Translation Rates by the Differential Activities of Ccr4-Not Nucleases. *Mol Cell* **70**, 1089-1100 e1088.

Zaghlool, A., Ameer, A., Nyberg, L., Halvardson, J., Grabherr, M., Cavelier, L., and Feuk, L. (2013). Efficient cellular fractionation improves RNA sequencing analysis of mature and nascent transcripts from human tissues. *BMC Biotechnol* **13**, 99.

Zerbino, D.R., Achuthan, P., Akanni, W., Amode, M.R., Barrell, D., Bhai, J., Billis, K., Cummins, C., Gall, A., Giron, C.G., *et al.* (2018). Ensembl 2018. *Nucleic Acids Res* **46**, D754-D761.

Zhang, L., Kasif, S., Cantor, C.R., and Broude, N.E. (2004). GC/AT-content spikes as genomic punctuation marks. *Proceedings of the National Academy of Sciences* **101**, 16855-16860.

Zhou, Z., Dang, Y., Zhou, M., Li, L., Yu, C.H., Fu, J., Chen, S., and Liu, Y. (2016). Codon usage is an important determinant of gene expression levels largely through its effects on transcription. *Proc Natl Acad Sci U S A* **113**, E6117-E6125.

Zolotukhin, S., Potter, M., Hauswirth, W.W., Guy, J., and Muzyczka, N. (1996). A "humanized" green fluorescent protein cDNA adapted for high-level expression in mammalian cells. *J Virol* **70**, 4646-4654.
